# Supplementary material for: Simultaneous sequencing of coding and noncoding RNA reveals a human transcriptome dominated by a small number of highly expressed noncoding genes
Source: PubMed Central journal article supplement — RNA. 2018 Jul;24(7):950–65. doi: 10.1261/rna.064493.117 (PMC6004057; doi:10.1261/rna.064493.117), 2018-07
Supplement: supp_064493.117_Supplemental_Figures_Tables.pdf [file supp_064493.117_Supplemental_Figures_Tables.pdf]

## Supplemental Material

**Simultaneous sequencing of coding and non-coding RNA reveals a human transcriptome dominated by a small number of highly expressed non-coding genes**

Boivin and Deschamps-Francoeur et al., 2018

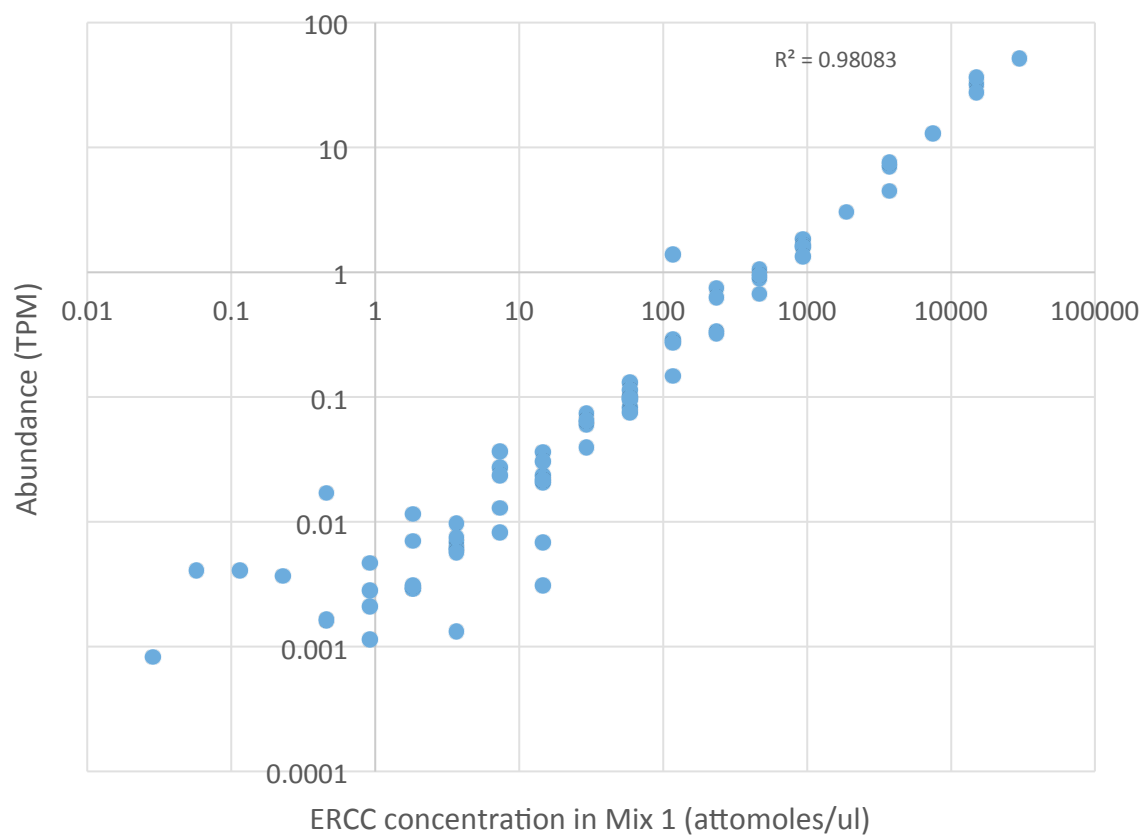

**Figure S1.** Comparison between the concentration of ERCC (External RNA Controls Consortium; from Thermo Fisher Scientific) spike-in RNAs added to the library and the estimated abundance of these molecules as detected by FRT-seq. The Pearson correlation is 0.99.

**A**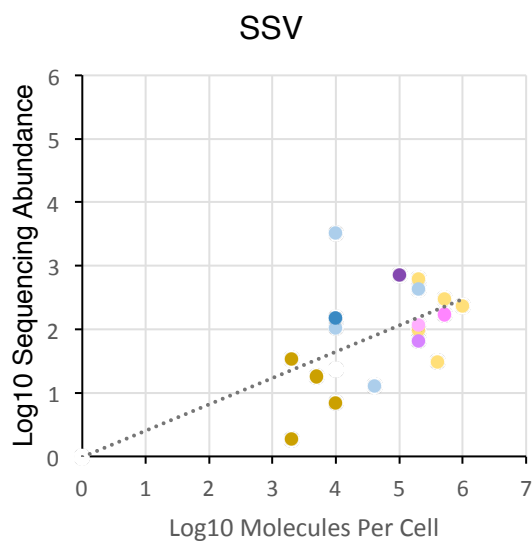

Pearson: -0.10  
Spearman: 0.50

**B**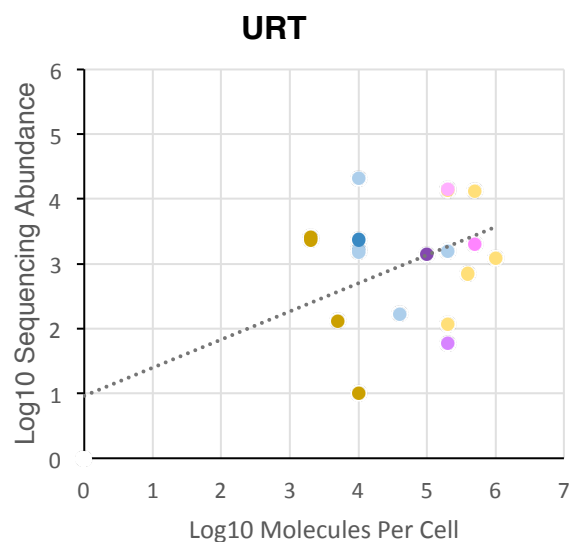

0.02  
-0.02

**C**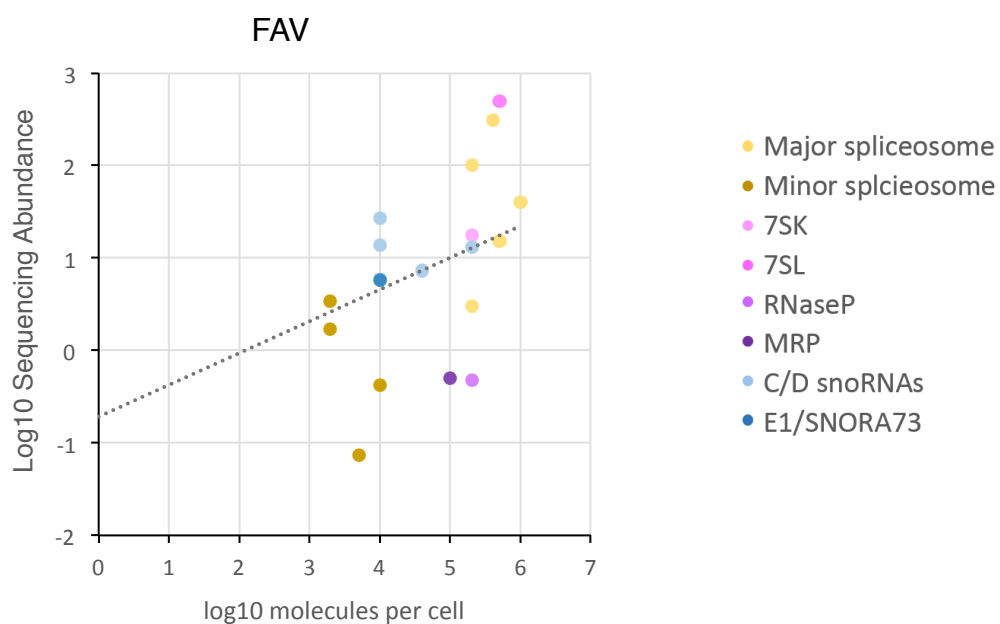

Pearson: 0.41  
Spearman: 0.61

**Figure S2** (related to Figure 1). Comparison between the capacity of different sequencing methods to detect the abundance of the RNA component of major ribonucleoprotein particles. The abundance (TPM) of eight different classes of non-coding RNA was determined using the different sequencing methods described in Figure 1B and compared to the established number of molecules per cell previously estimated using immunoprecipitation of labeled RNA (Tyc et al (2006) *The Ever-Growing World of Small Nuclear Ribonucleoproteins*. In *The RNA World (Third Edition)*). The Pearson and Spearman correlation coefficients are indicated at bottom.

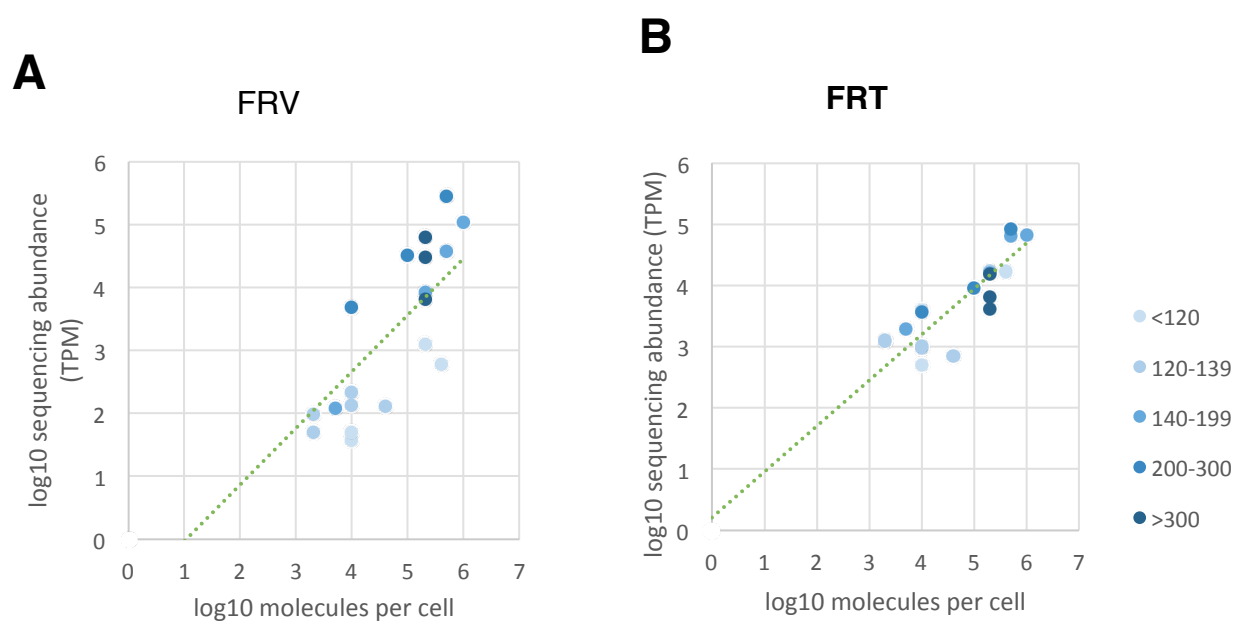

**Figure S3 (related to Figure 1C).** Evaluation of the size bias of (A) viral (FRV) and (B) TGIRT (FRT) reverse transcriptase based sequencing methods using a standard set of non-coding RNA. The non-coding RNA abundance obtained by the viral RT or TGIRT based sequencing methods FRV or FRT was plotted against established estimates of the number of molecules per cell as in Figure 1C. The size of the different RNA molecules used is indicated on the right (in nucleotides). The dotted line represents the linear trendline with best fit for the data points.

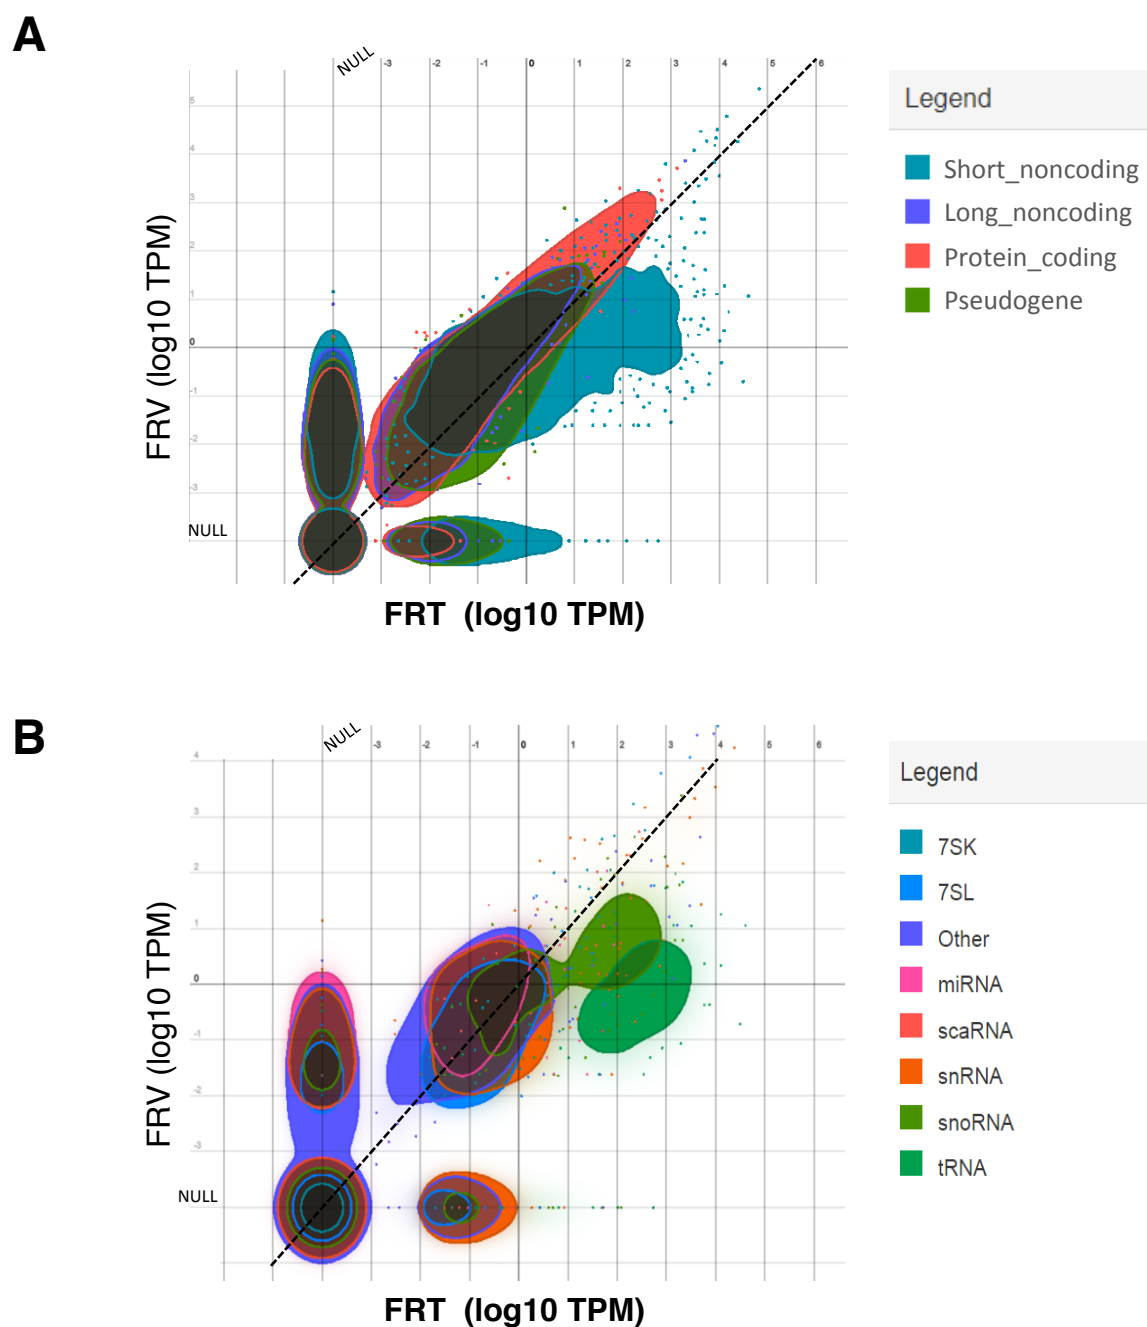

**Figure S4** (related to Figures 1 and 2). Comparison between the RNA abundance values generated by viral (FRV) and TGIRT (FRT) reverse transcriptase based sequencing methods. The values obtained by FRV and FRT for either all transcripts (A) or only short non-coding RNA (B) were compared using splatterplots (see <https://www.ensembl.org/Help/Faq?id=468> for extensive description of the different RNA types groups in (A)). The different types of RNAs compared are indicated on the right. The diagonal line shows a perfect positive correlation regression as a visual help. The splatterplots were produced using the Splatterplots JS browser-based tool (available online at <http://graphics.cs.wisc.edu/Projects/SplatterJs>).

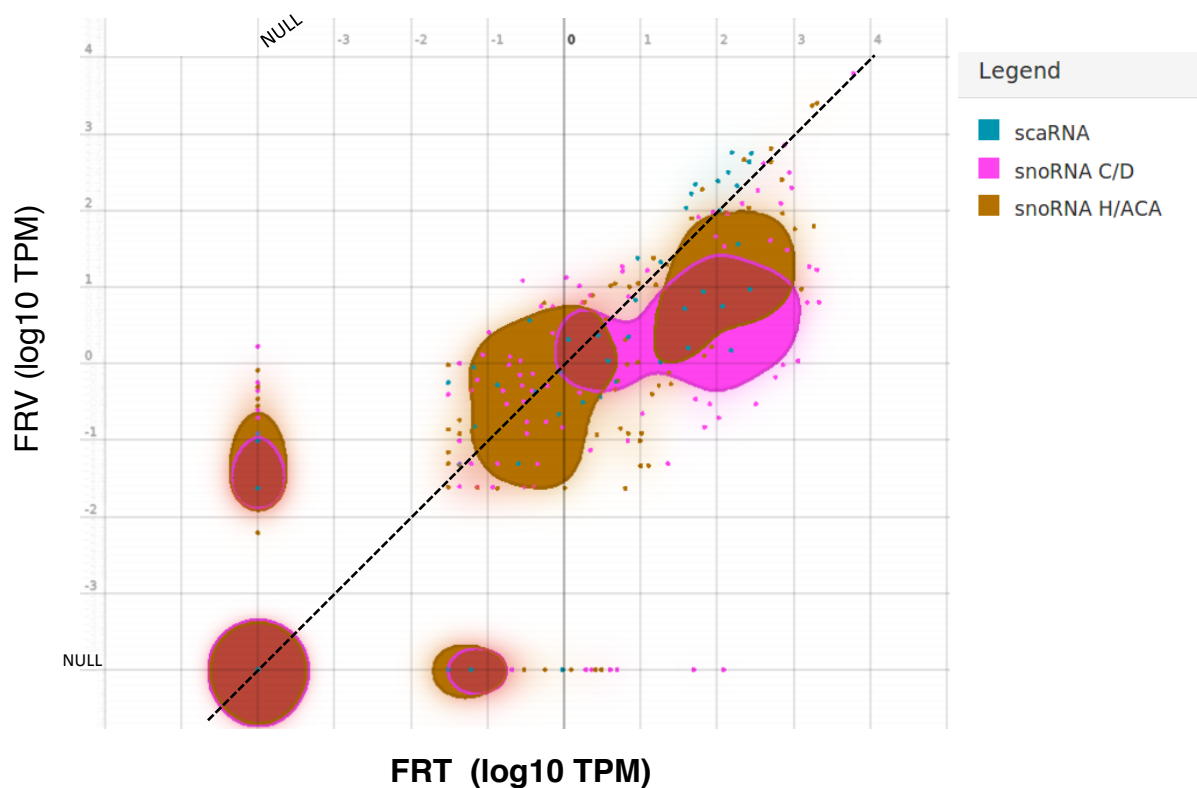

**Figure S5** (related to Figures 1 and 4). Comparison between the snoRNA abundance values generated by viral (FRV) and TGIRT (FRT) reverse transcriptase based sequence methods. The abundance of C/D, H/ACA and scaRNA obtained using FRV and FRT were compared and presented in the form of a splatterplot. The different types of RNAs compared are indicated on the right. The diagonal line shows a perfect positive correlation regression as a visual help. The splatterplot was produced using the Splatterplots JS browser-based tool (available online at <http://graphics.cs.wisc.edu/Projects/SplatterJs>).

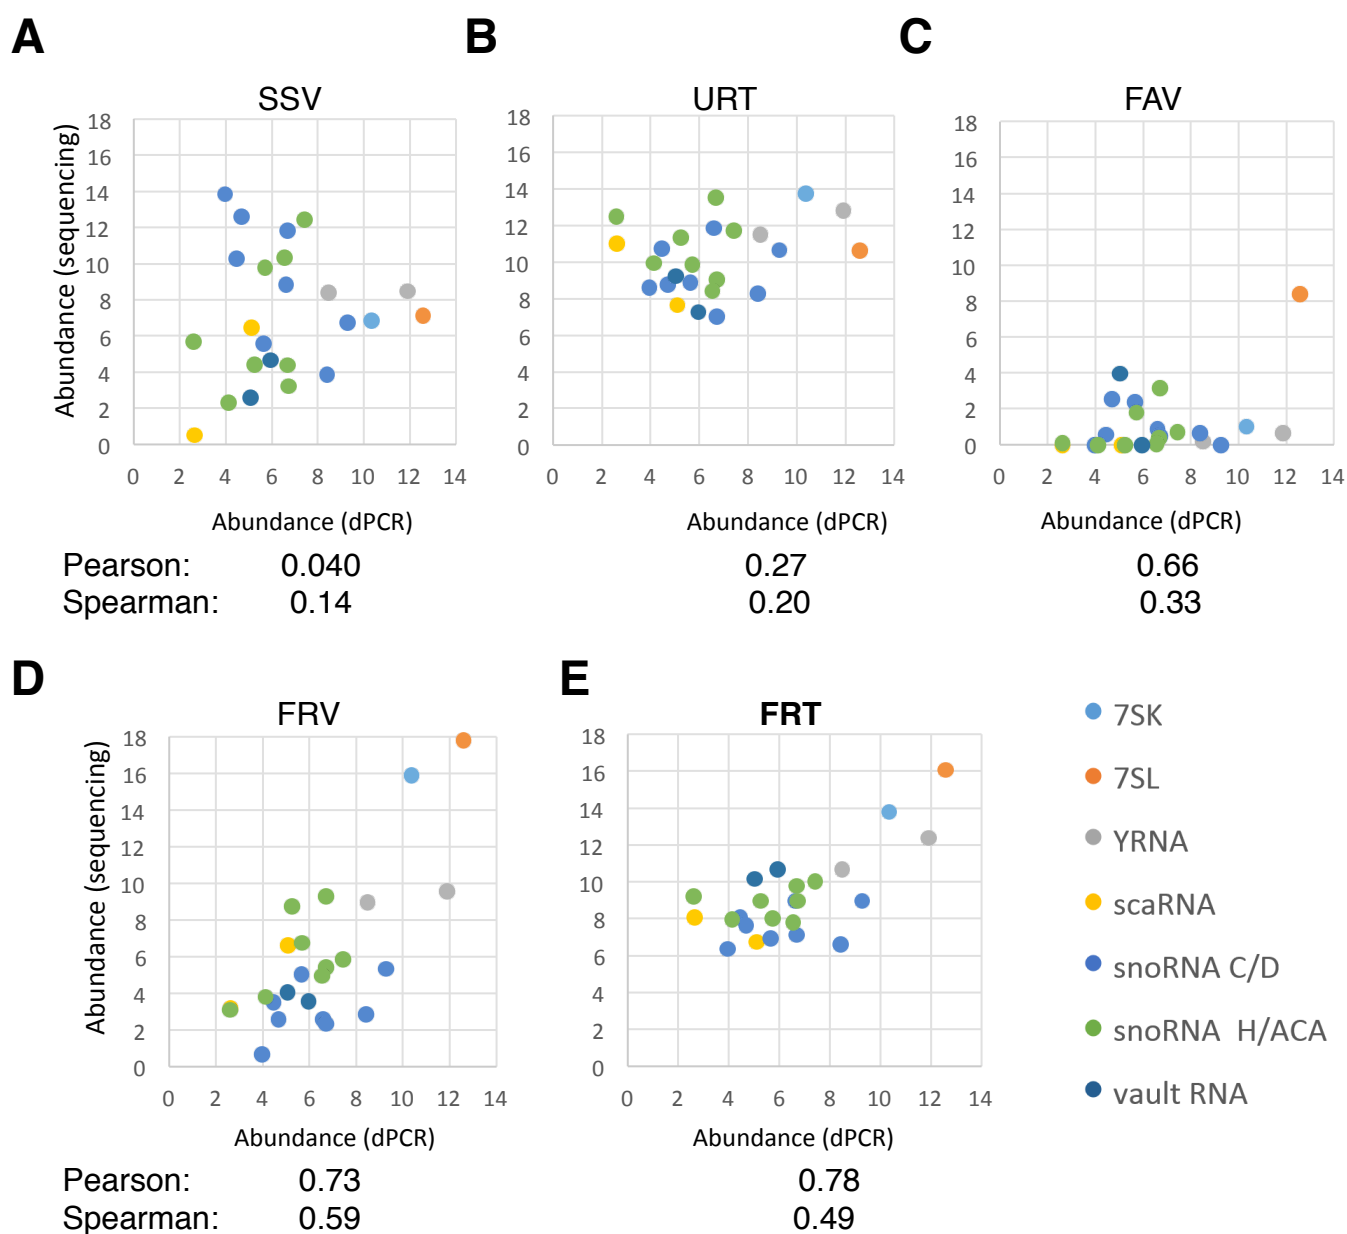

**Figure S6** (related to Figure 1). Comparison between the RNA abundance values detected by digital PCR (dPCR) and those detected using different sequencing methods. The RNA abundance was detected with different sequencing protocols using different RNA selection methods and reverse transcriptases including: Size selected viral reverse transcriptase sequencing (SSV), Ribodepleted TGIRT sequencing (URT), Fragmented poly A selected viral reverse transcriptase sequencing (FAV), Fragmented ribodepleted viral reverse transcriptase sequencing (FRV), Fragmented ribodepleted TGIRT sequencing (FRT). The resulting digital PCR values (expressed as log<sub>2</sub> of the number of copies/ul detected) were compared to the abundance of the same molecules by the different sequencing approaches (shown as log<sub>2</sub> of TPM). The values used for the sequencing are the average of two biological replicates. The Pearson and Spearman coefficients for each pair of comparisons are indicated at the bottom of each scatter plot. The names of the different RNA considered are shown on the bottom right corner. The primers used for the dPCR are listed in Table S10.

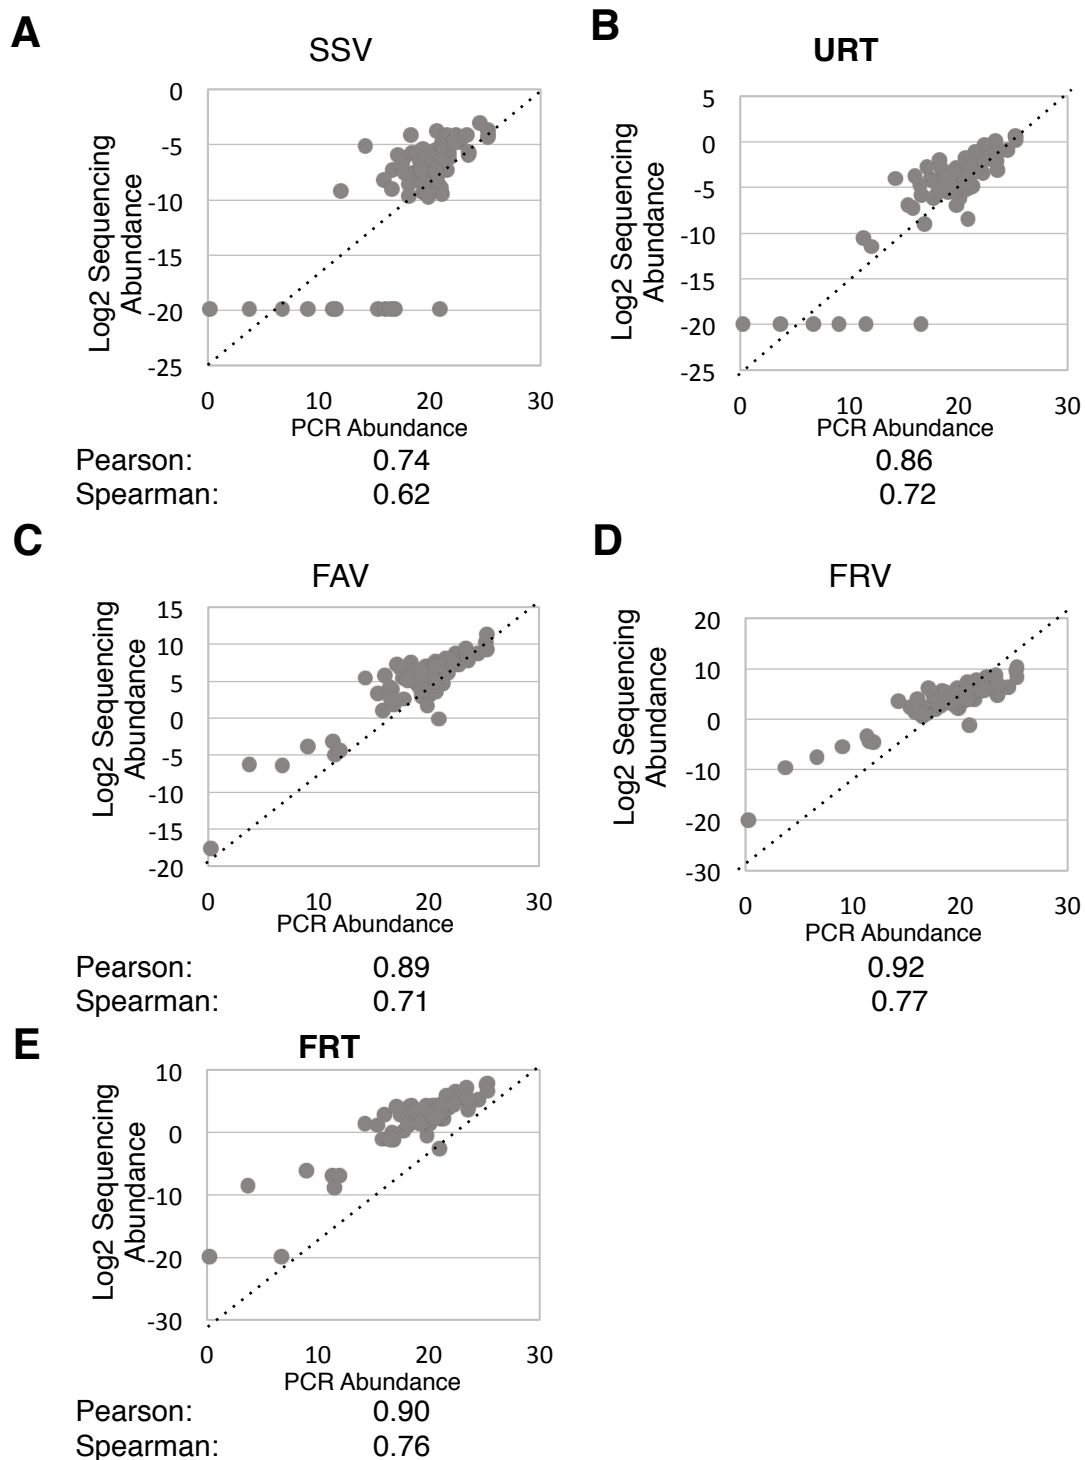

**Figure S7** (related to Figures 1, 2 and 3). Comparison between the capacity of the different sequencing methods and quantitative RT-PCR to predict mRNA abundance. The protein-coding mRNA abundance was detected with different sequencing protocols using different RNA selection methods and reverse transcribed as described in Figure 1 and the resulting values compared to those detected by quantitative RT-PCR using viral reverse transcriptases in the same RNA sample. The values used are the average of two biological replicates. The Pearson and Spearman coefficients for each pair of comparisons are indicated at the bottom of each scatter plot.



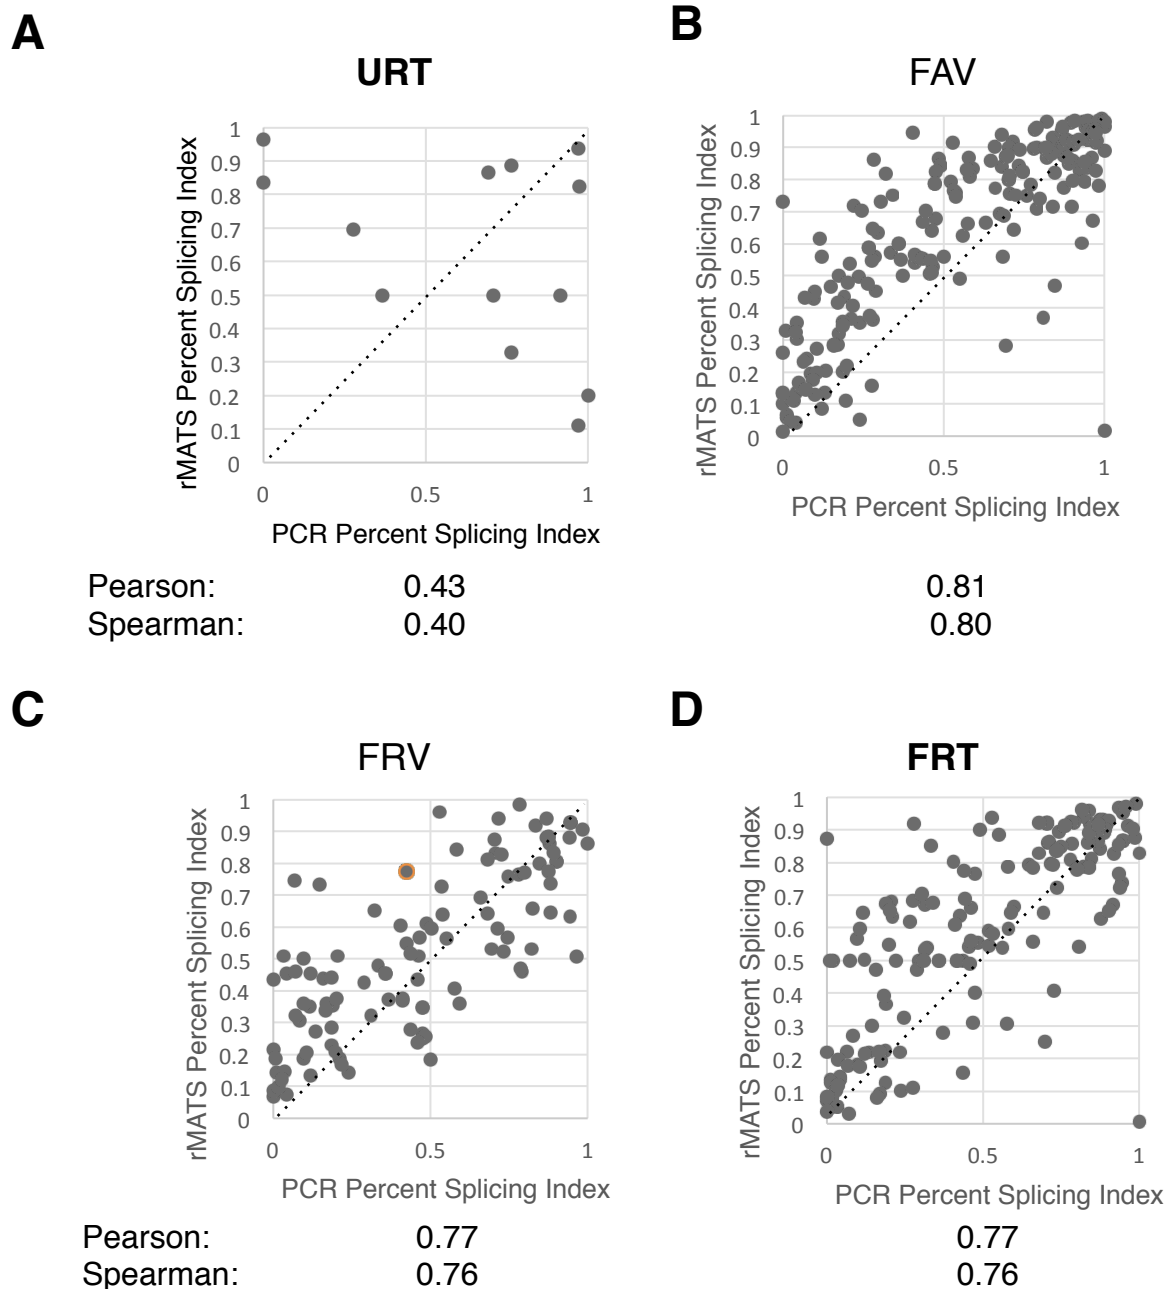

**Figure S8** (related to Figure 1). Comparison between the capacity of the different sequencing methods and quantitative RT-PCR to predict the ratio of splicing isoforms. The splicing index predicted by rMATS using data generated from different sequencing protocols described in Figure 1 was compared with that obtained by ASPCR (alternative splicing analysis by endpoint RT-PCR) using viral reverse transcriptases in the same RNA sample. The values used are the average of two biological replicates. The Pearson and Spearman coefficients for each pair of comparisons are indicated at the bottom of each scatter plot.

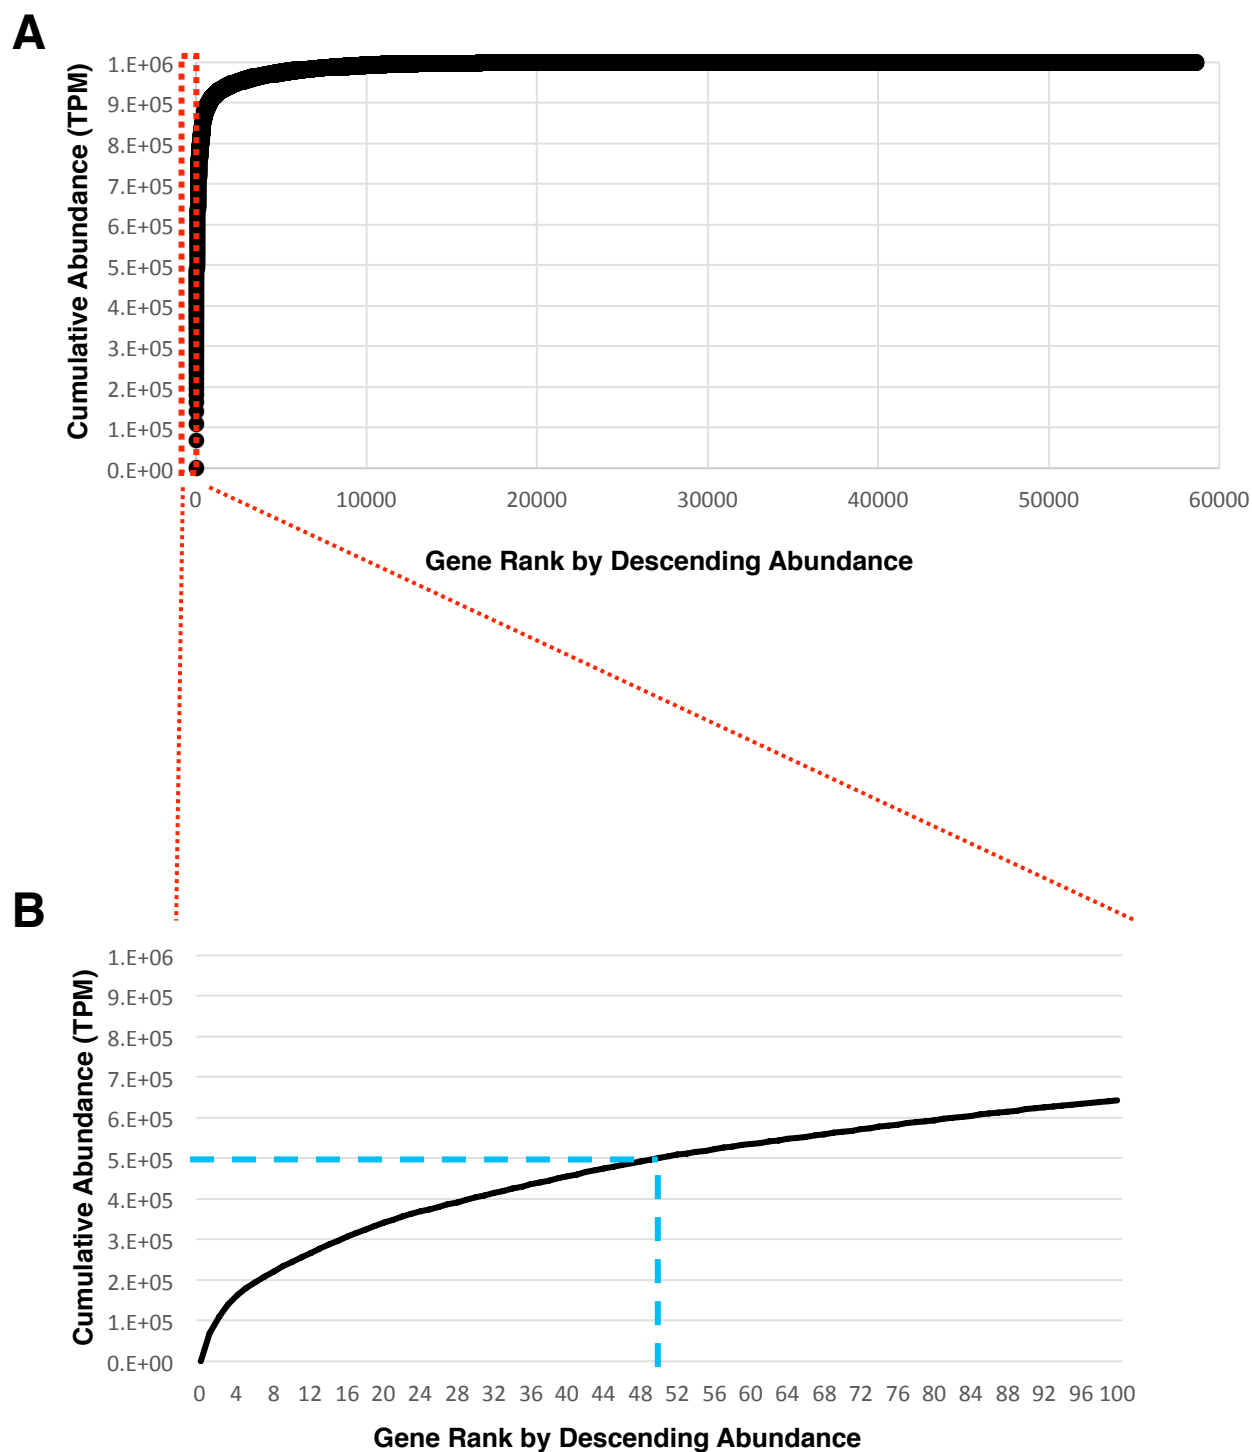

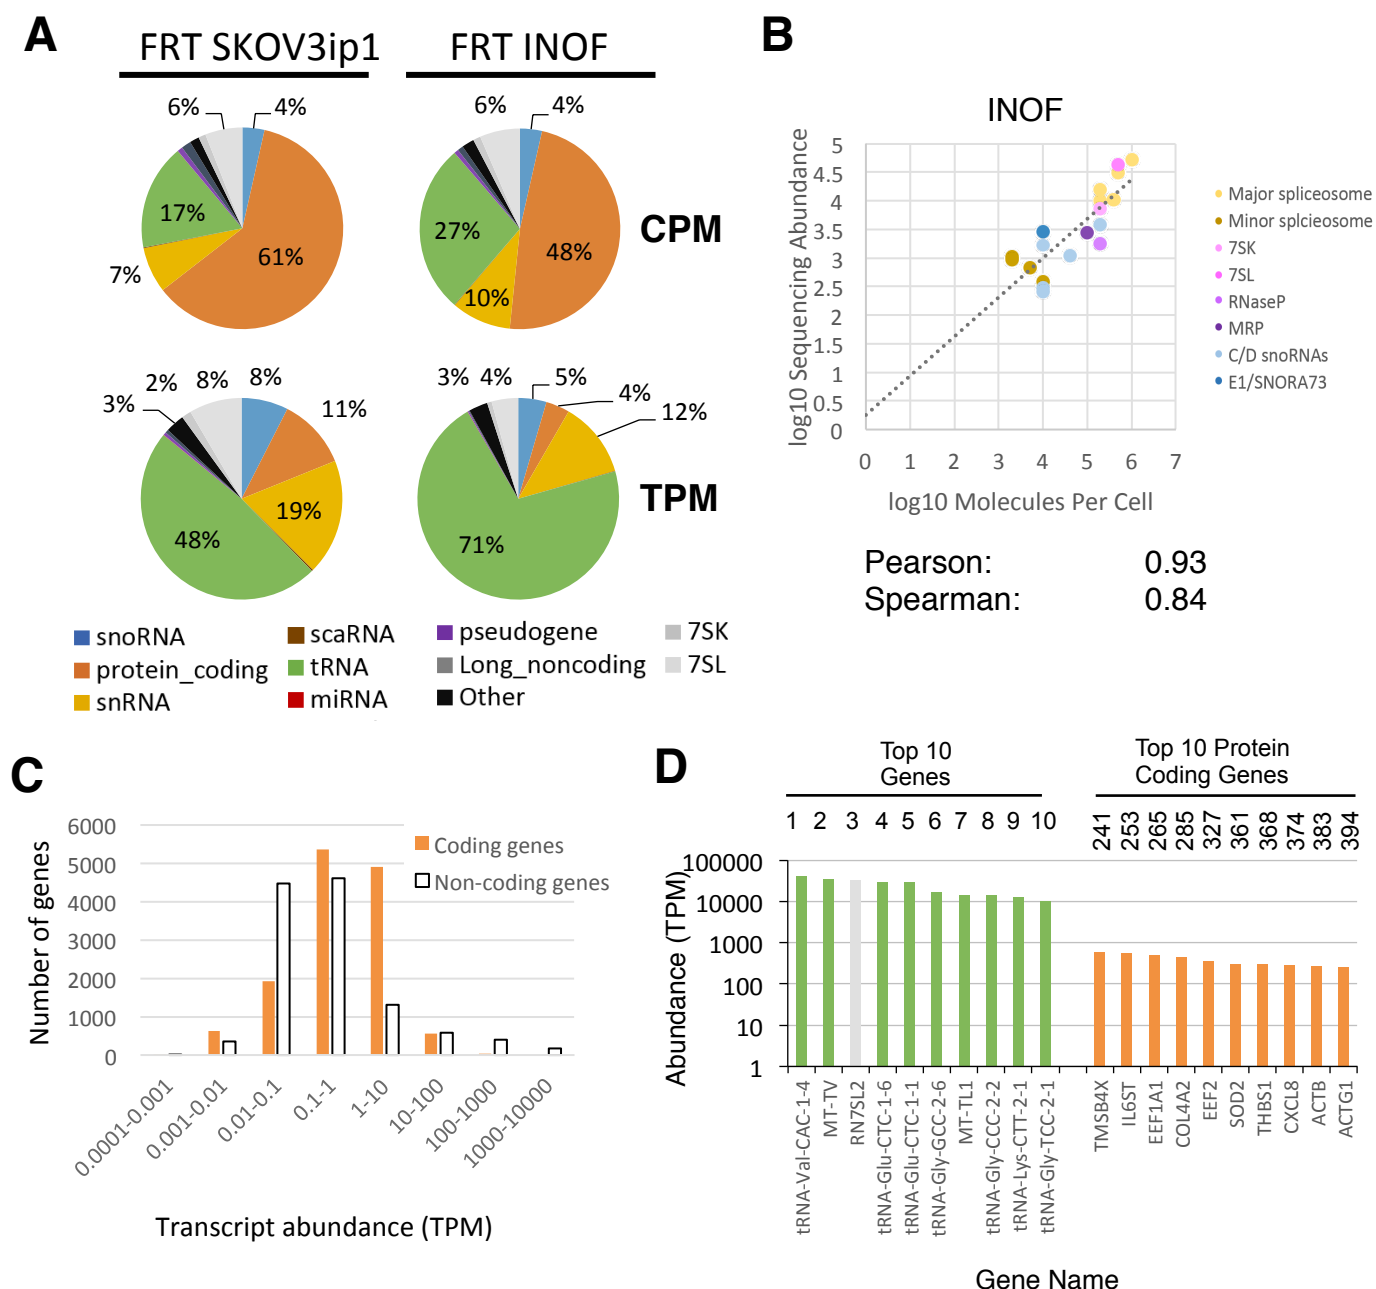

**Figure S10** (related to Figures 1 and 2). Comparison between results obtained from FRT RNA-Seq in SKOV3ip1 and INOF cell lines. (A) Distribution of RNA in the human transcriptome as detected by the FRT sequencing method in SKOV3ip1 and INOF. The percentage of the main classes ( $\geq 2\%$ ) is indicated. The color legend for the different RNA classes is shown at bottom. (B) Comparison between FRT sequencing of INOF and the established number of molecules per cell previously estimated using immunoprecipitation of labeled RNA (as in Figure 1C right panel). The Pearson and Spearman correlation coefficients are indicated at bottom. (C) The abundance of both coding and non-coding genes in FRT INOF, separated in bins based on transcript abundance and the number of genes per bin illustrated in the form of a bar graph. (D) The genes producing the top ten overall most abundant transcripts and the top ten most abundant protein coding RNA in FRT INOF are indicated in the form of a bar graph. The rank of each transcript based on abundance in transcript per million (TPM) is indicated on top.

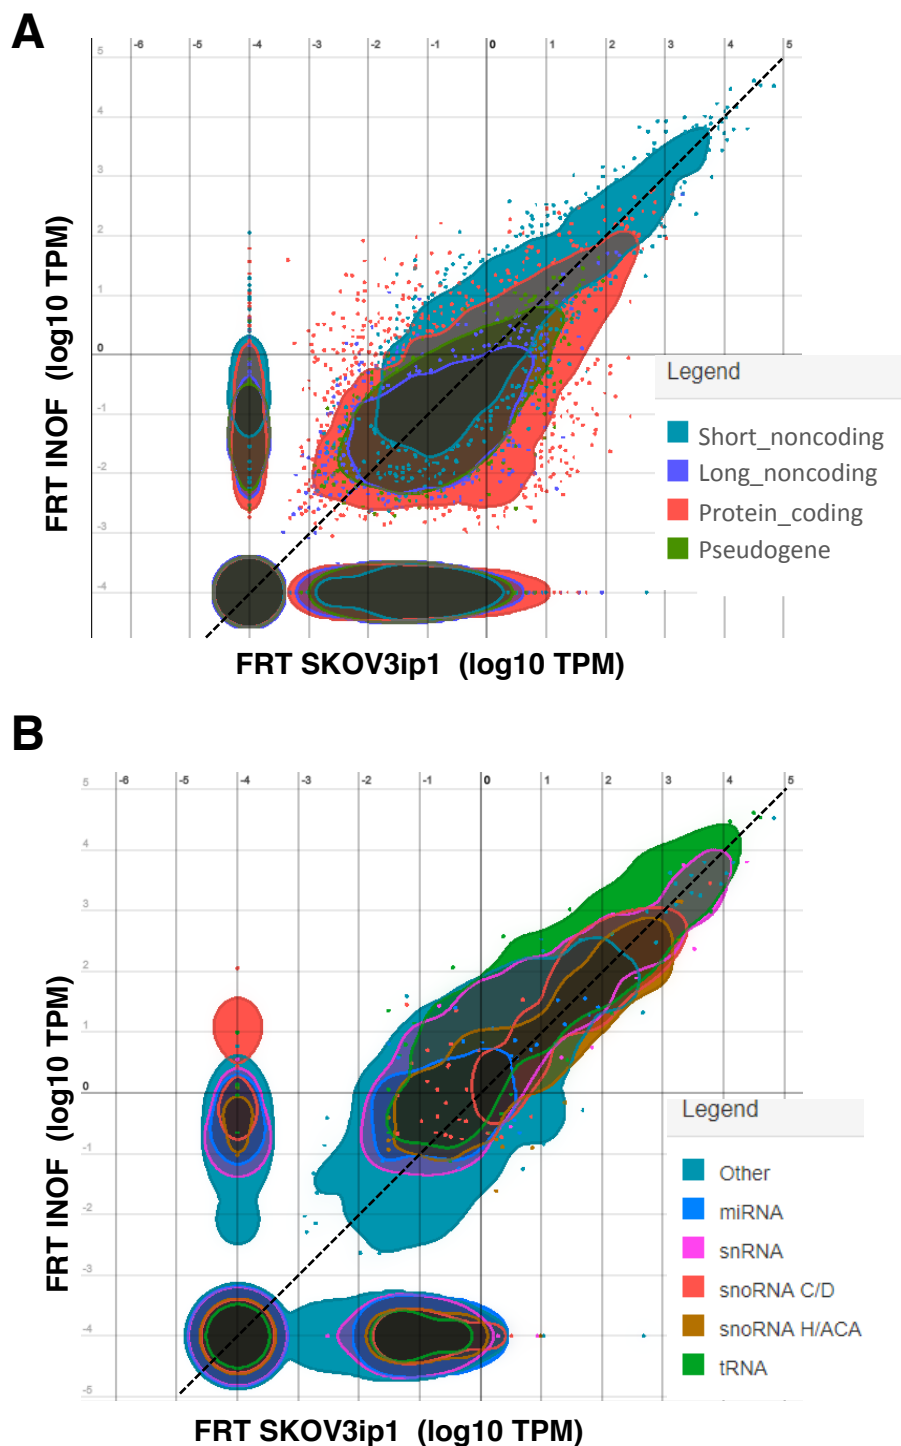

**A**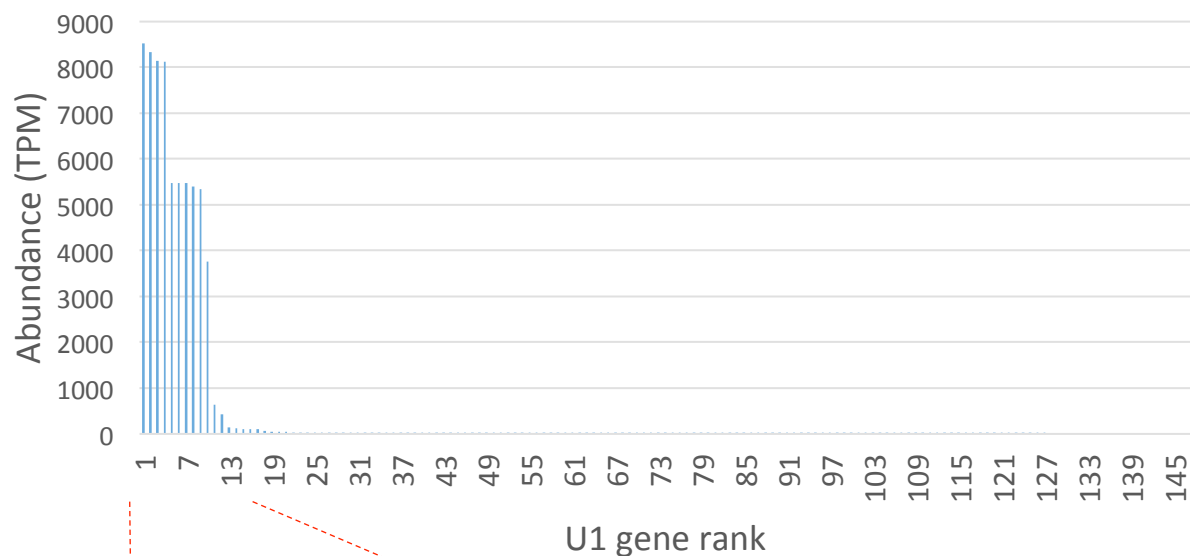**B**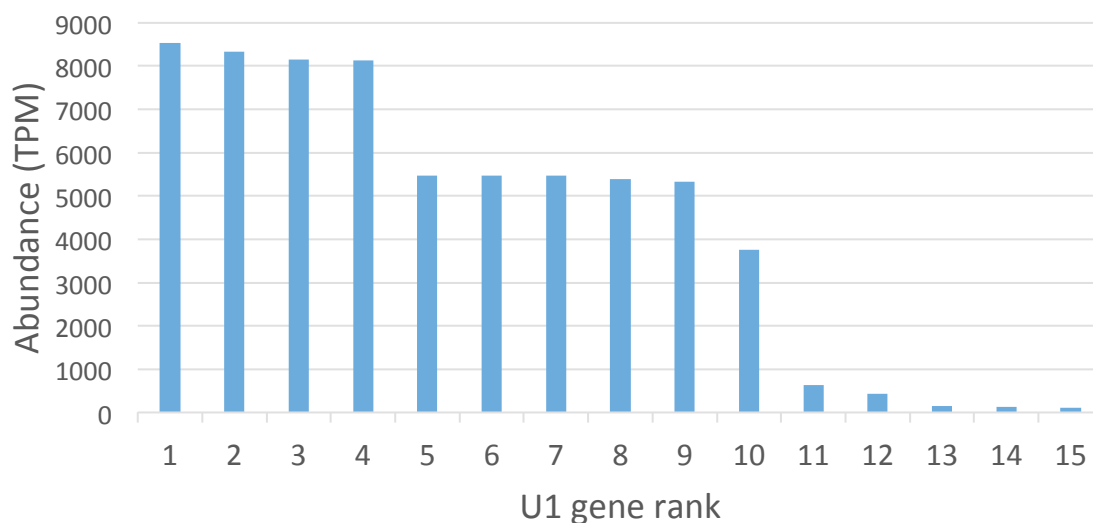

**Figure S12** (related to Figure 2). U1 snRNA is a multi-copy gene whose ten most highly expressed copies produce >96% of U1 transcripts. **(A)** 147 copies of the U1 snRNA are annotated in the human genome, most of which are not detected or are detected at very low levels. **(B)** Close up of the ten most abundant U1 transcripts are detected at levels between 3000 and 9000 TPM.

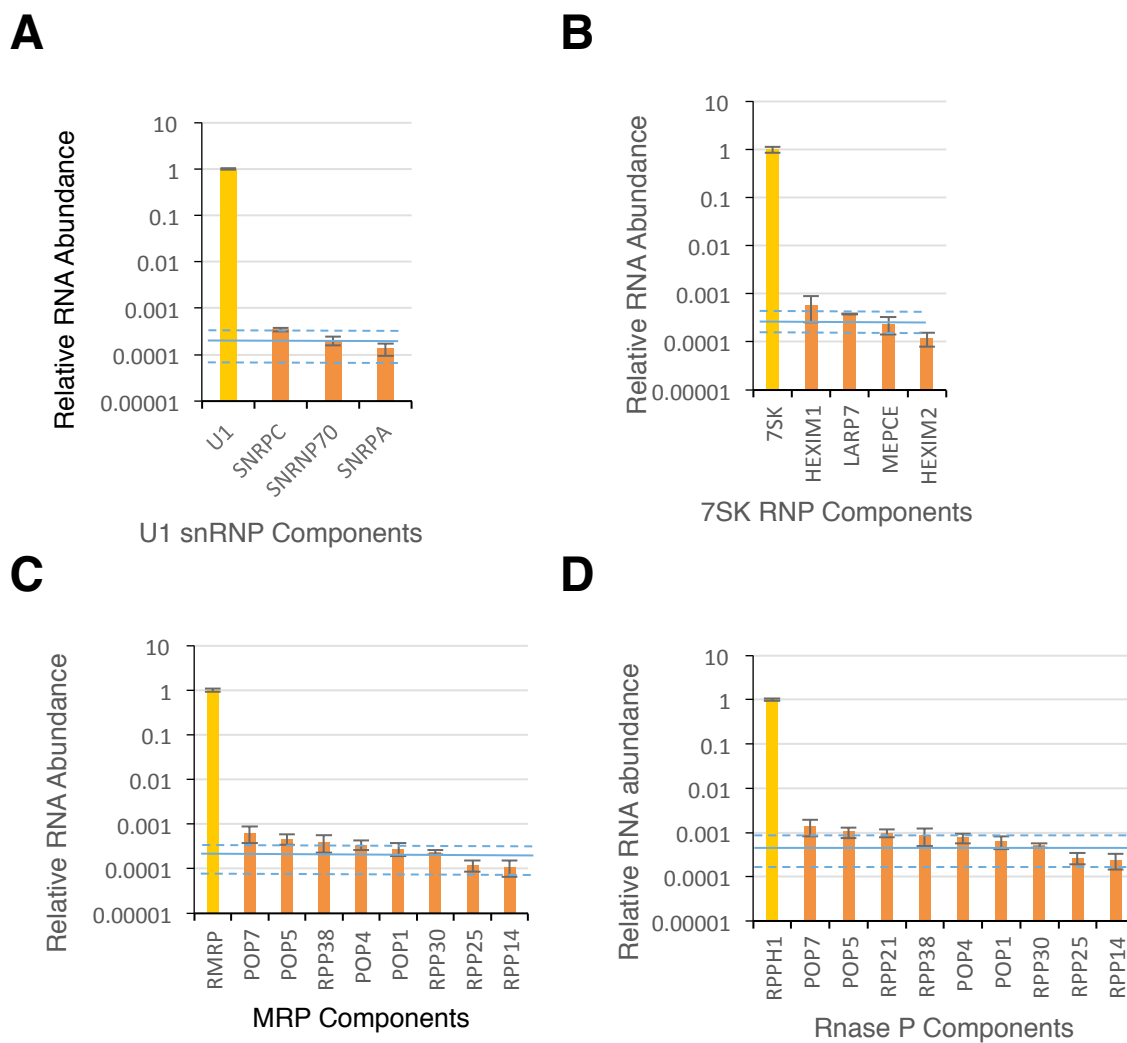

**Figure S13** (related to figure 3). Relative abundance of the coding and non-coding RNA components of ribonucleoprotein particles as detected by FRT. The abundance of mRNA coding for the protein components of U1 snRNP (A), 7SK RNP (B), Ribonuclease MRP (C) and the ribonuclease RNase P (D) were detected and plotted relative to their respective non-coding RNA. The solid line indicates the mRNA average abundance level of the complex and the dashed lines indicate the 5% and 95% confidence interval. The standard deviation of two biological replicates is indicated in the form error bars.

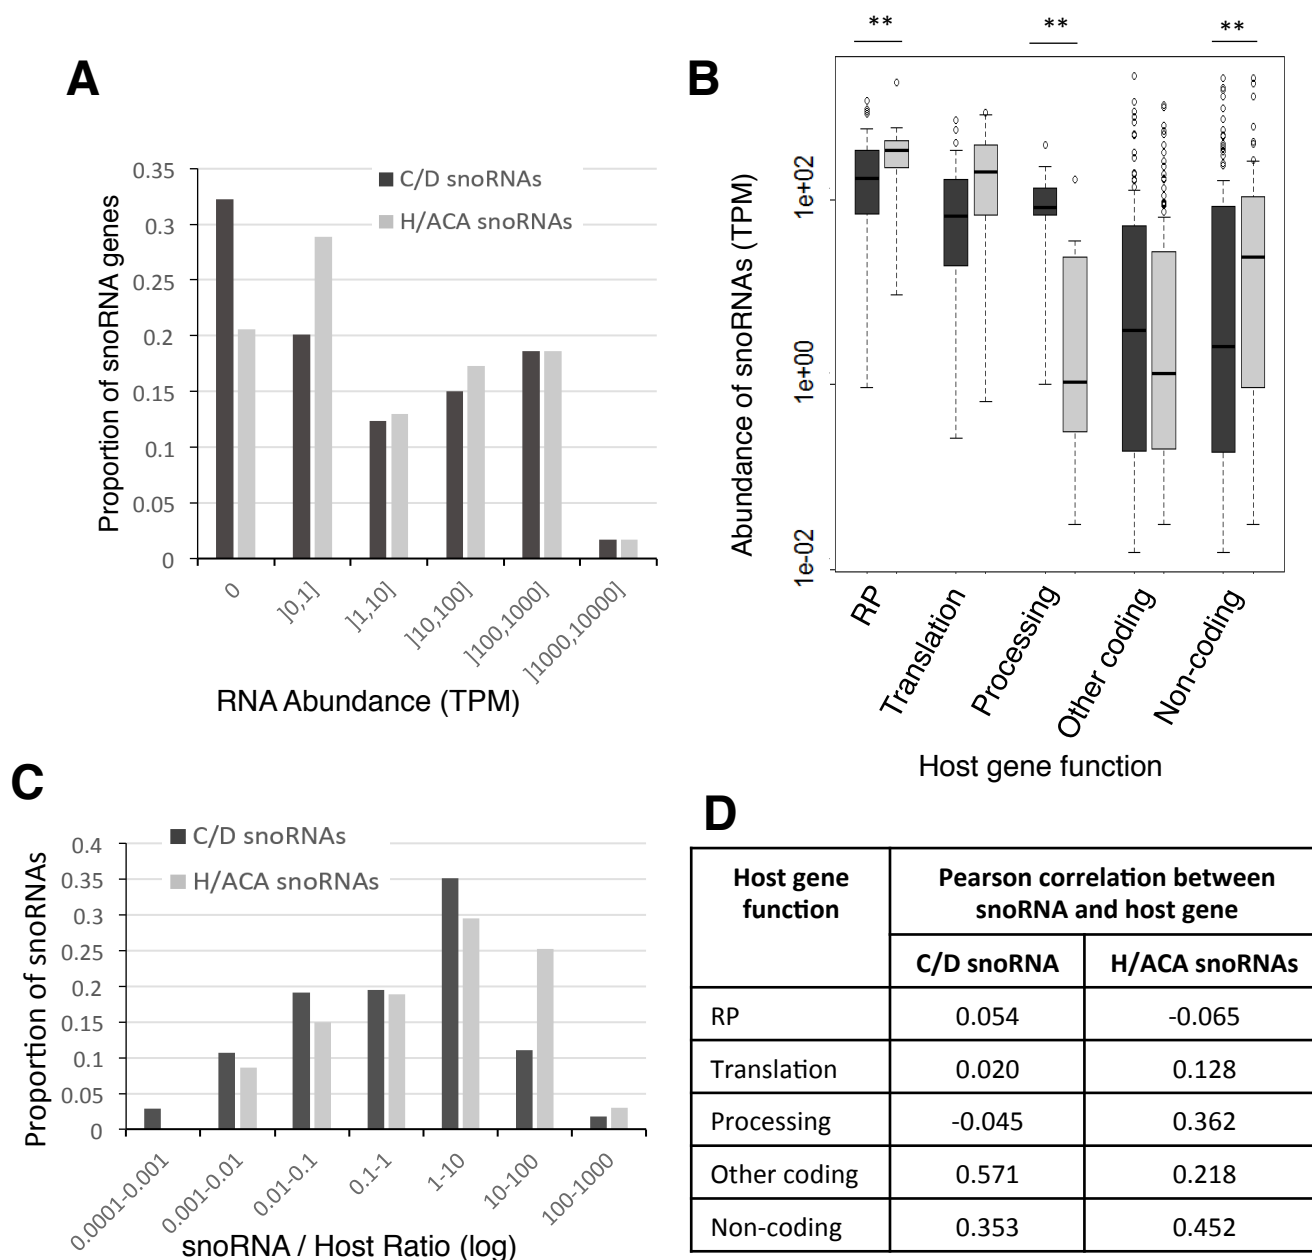

**Figure S14** (related to figure 4). (A) The abundance of both C/D and H/ACA snoRNA was determined using FRT, binned and represented in the form of a bar graph. (B) Box plot illustrating the distribution of C/D and H/ACA snoRNA abundance separated by the function of the host gene. RP indicates host genes coding for ribosomal proteins, translation indicates host genes implicated in translation and ribosome biogenesis, processing indicates host genes involved in splicing and RNA maturation, other coding includes all protein-coding host genes not present in other categories and non-coding indicates host genes with no coding sequence, as defined by Ensembl annotations. The black boxes indicate C/D snoRNA, while grey boxes indicate H/ACA snoRNA. The solid line indicates the median value while \*\* indicates a p-value <0.01 as obtained using a Kolmogorov-Smirnov goodness-of-fit test (C) Bar graph representing the proportion of C/D and H/ACA snoRNA exhibiting different snoRNA / host RNA ratios. (D) Table indicating the Pearson correlations between the abundance of snoRNAs and of their host genes, grouped according to host gene functions and abbreviated as in (B).

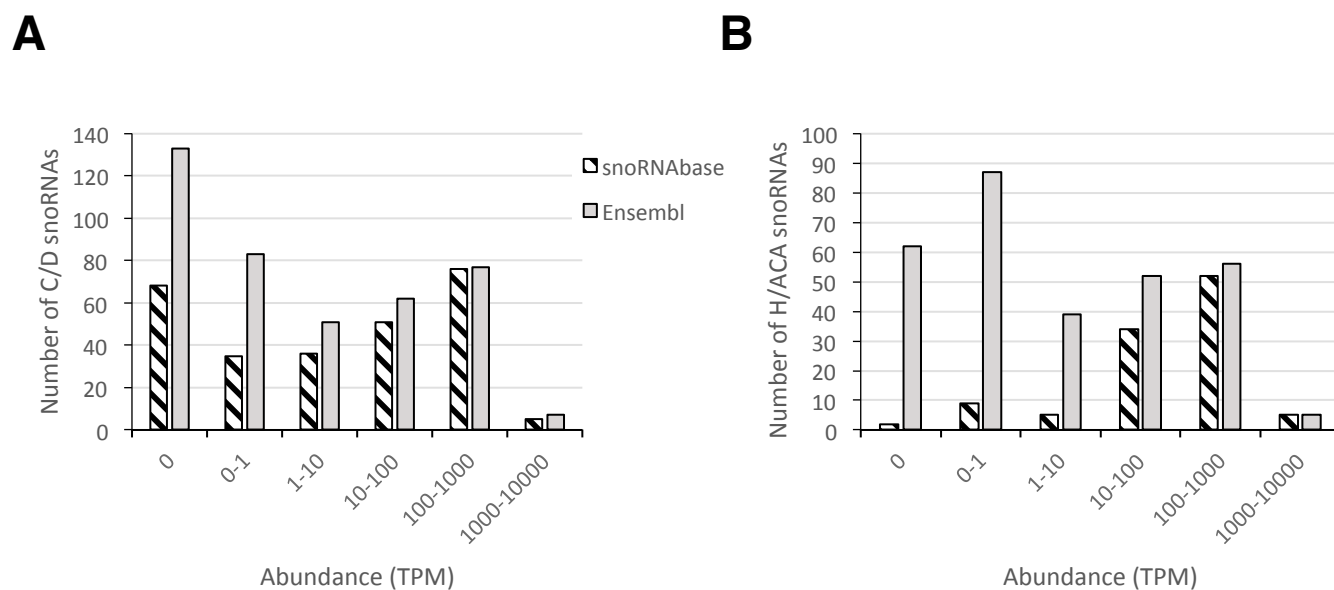

**Figure S15** (related to figure 4). Number of snoRNAs annotated in the snoRNAbase and Ensembl databases detected by FRT. The abundance of both C/D (A) and H/ACA (B) snoRNAs was determined using FRT and the number of genes annotated in the snoRNAbase (striped columns) and Ensembl databases (gray columns) corresponding to the different levels of gene expression is illustrated in the form of bar graphs.



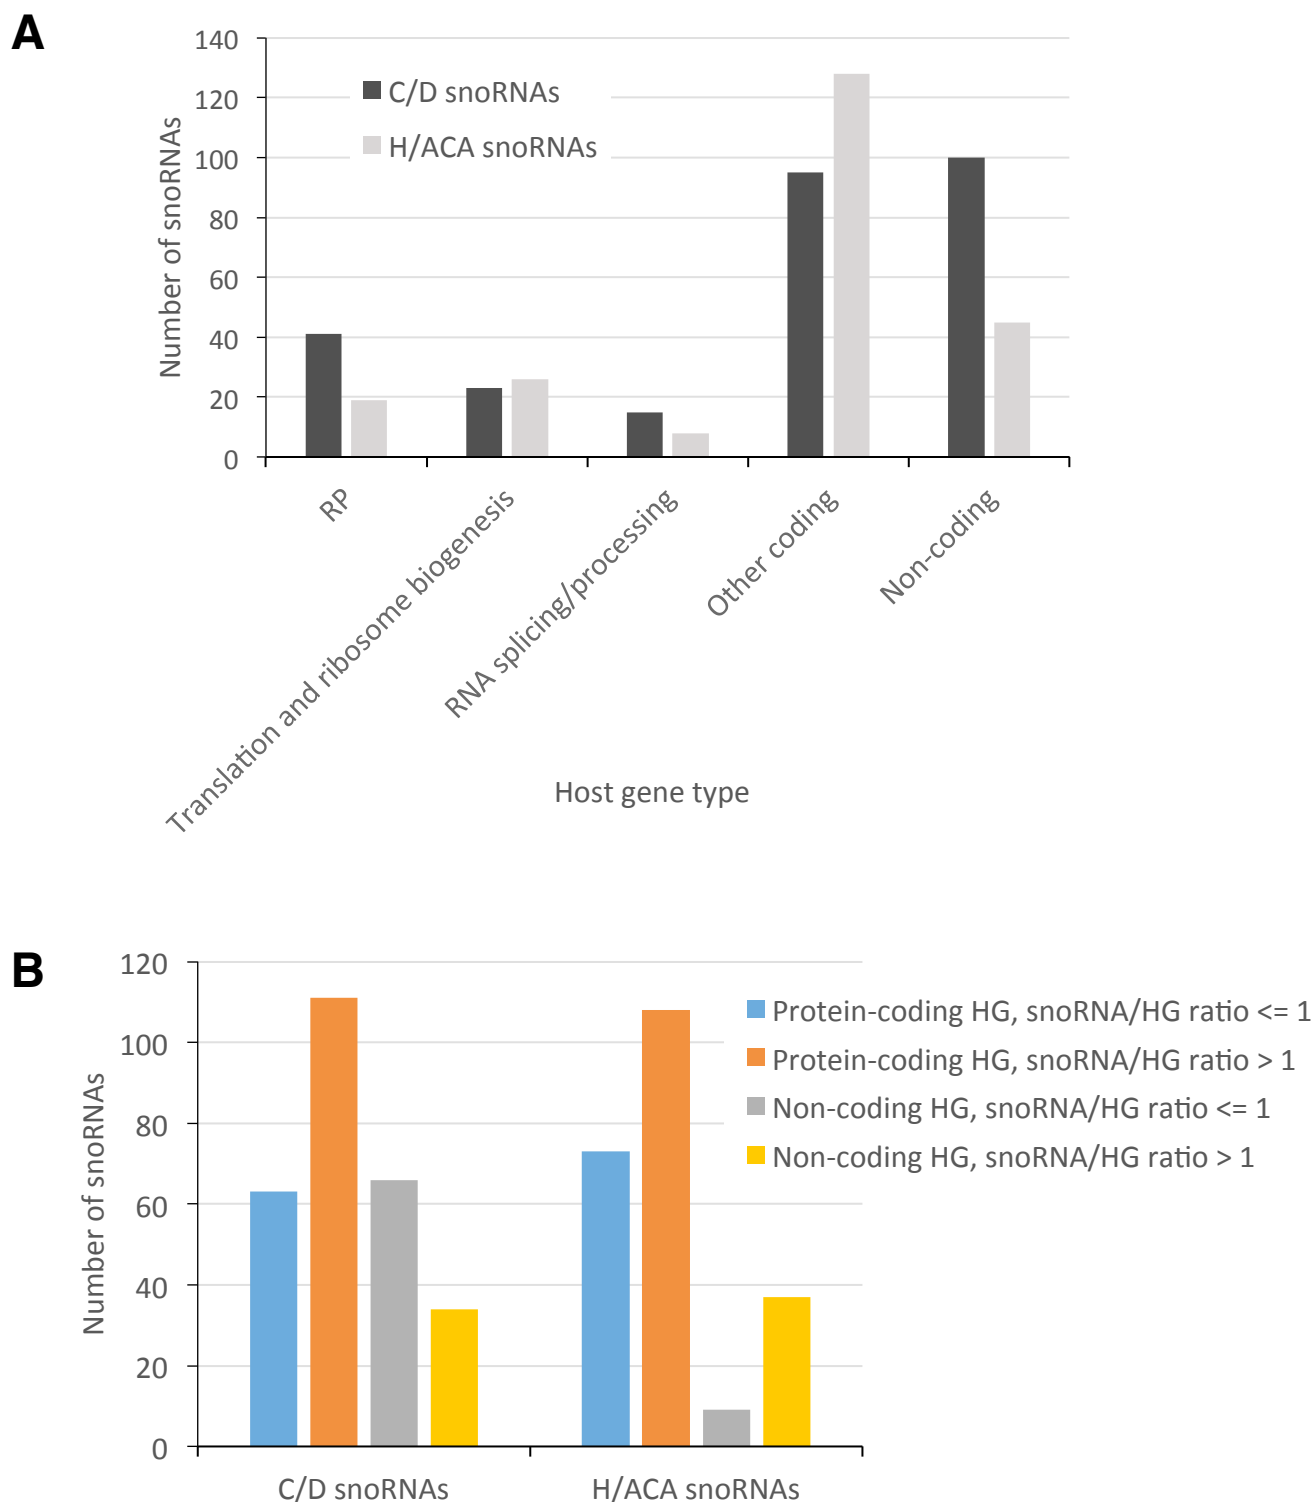

**Figure S16** (related to figure 4). (A) The number of snoRNAs encoded in host genes of different types is shown for both C/D snoRNAs (black columns) and H/ACA snoRNAs (pale grey columns). (B) The number of snoRNAs in coding or non-coding host genes (HG) and with abundance lower (snoRNA/HG ratio  $\leq 1$ ) or higher (snoRNA/HG ratio  $> 1$ ) than their host gene (HG) is shown for both C/D and H/ACA snoRNAs.

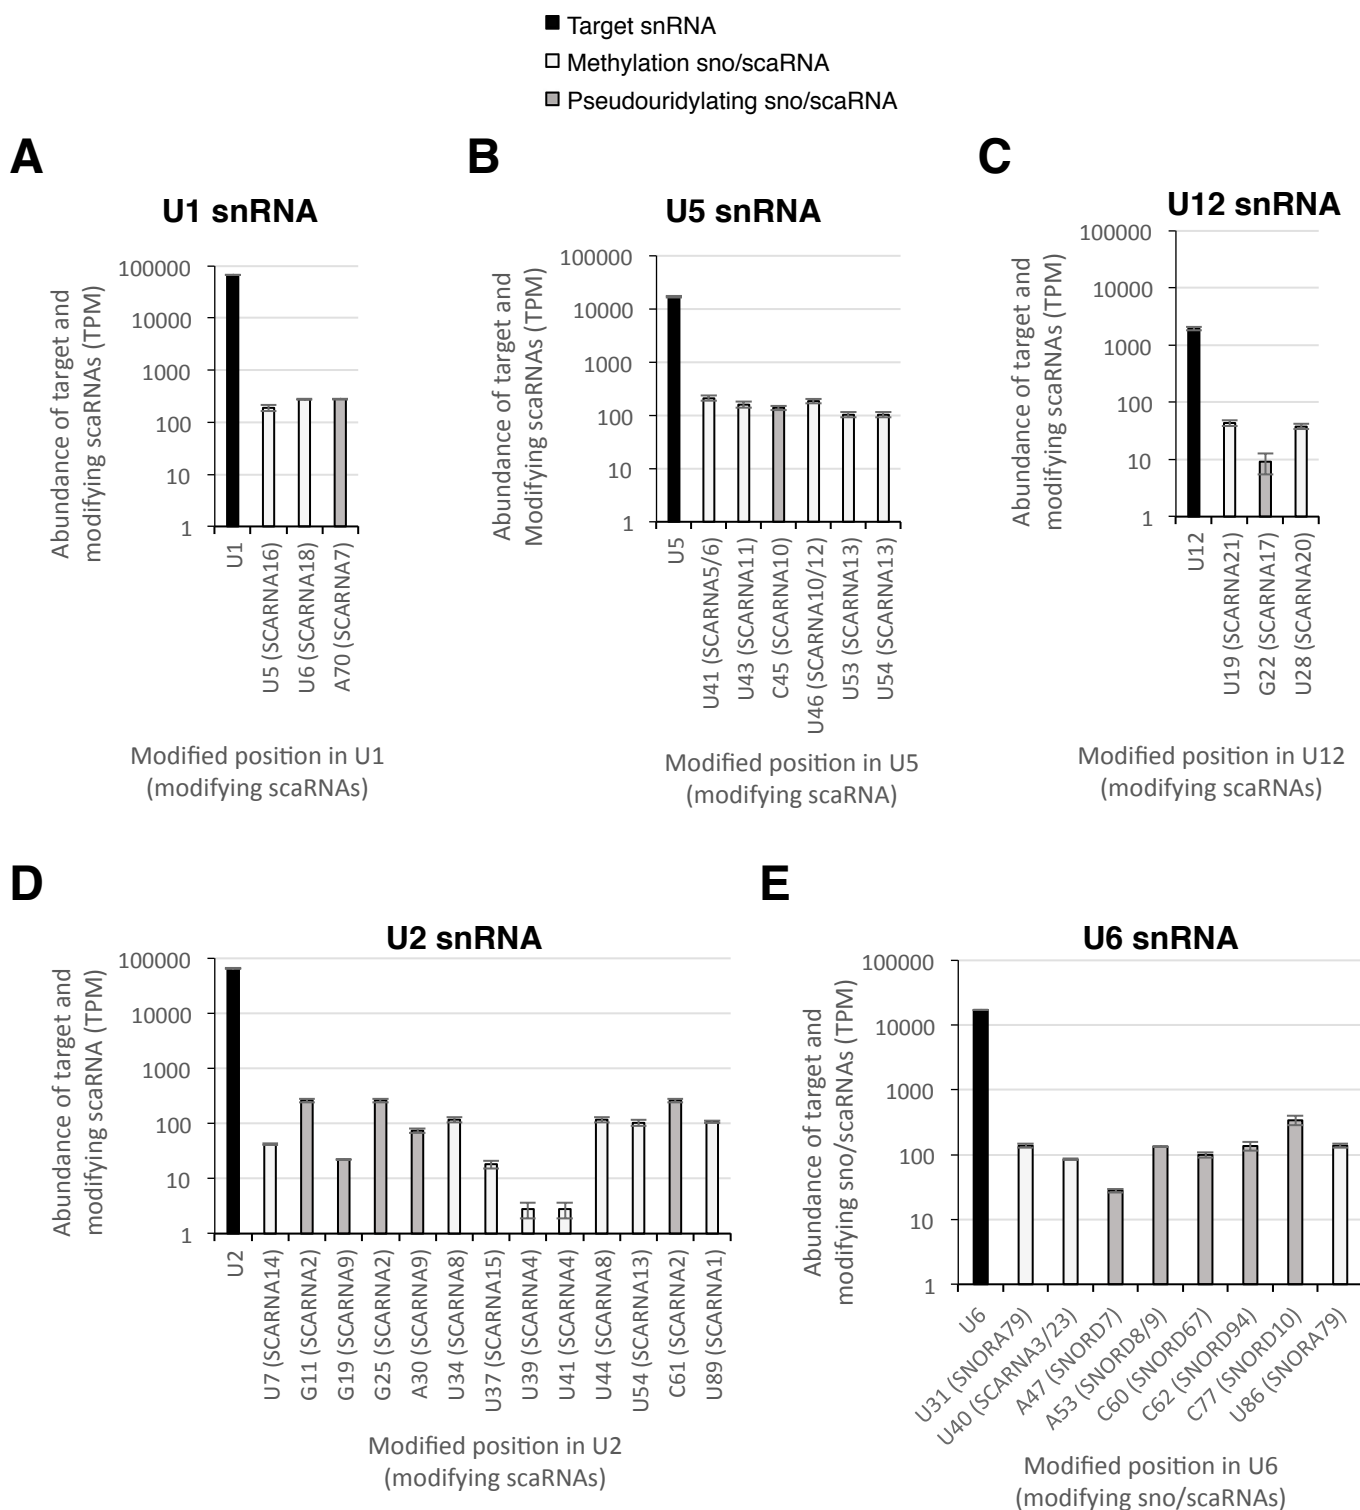

**Figure S17** (related to figure 5). Relative abundance of the scaRNA/snoRNA and their snRNA modification targets. (A-E) Relative abundance of scaRNAs/snoRNAs that modify U1 (A), U5 (B), U12 (C), U2 (D) and U6 (E) snRNAs. The abundance of the snRNA (black column) and that of scaRNAs/snoRNAs corresponding to different methylation (white columns) or pseudouridylation sites (grey columns) within the snRNA are indicated in the form of bar graphs.

| Dataset | Number of raw sequencing reads | Alignment rate |
|---------|--------------------------------|----------------|
| SSV_1   | 17116221                       | 98.7%          |
| SSV_2   | 15351481                       | 98.6%          |
| URT_1   | 49471618                       | 99.2%          |
| URT_2   | 37421215                       | 99.3%          |
| FAV_1   | 173632990                      | 96.1%          |
| FAV_2   | 200274722                      | 97.6%          |
| FRV_1   | 265305890                      | 99.3%          |
| FRV_2   | 292651704                      | 99.3%          |
| FRT_1   | 60971932                       | 99.3%          |
| FRT_2   | 41464929                       | 98.8%          |

**Table S1 (related to Figure 1).** Statistics summarizing the datasets considered in this study. The alignment rate represents the proportion of raw reads aligned to the genome (see Methods).

|          | URT   | FRT   | SSV   | FRV   | FAV   |
|----------|-------|-------|-------|-------|-------|
| Pearson  | 0.995 | 0.994 | 0.998 | 0.996 | 0.920 |
| Spearman | 0.791 | 0.905 | 0.696 | 0.933 | 0.919 |

**Table S2** Pearson and Spearman correlations between replicates for every sequencing method investigated.

| <b>Gene name</b> | <b>RNA type</b>                        | <b>Average total RNA abundance (TPM)</b> |
|------------------|----------------------------------------|------------------------------------------|
| U4               | snRNA (tri-snRNP)<br>major spliceosome | 15736.99                                 |
| U5               | snRNA (tri-snRNP)<br>major spliceosome | 16777.28                                 |
| U6               | snRNA (tri-snRNP)<br>major spliceosome | 17080.25                                 |
| U4atac           | Minor spliceosome                      | 1260.513                                 |
| U6atac           | Minor spliceosome                      | 1233.739                                 |

**Table S3** (related to Figure 1). Average total abundance (TPM) of the major and minor spliceosome tri-snRNP RNAs, according to FRT.

**Table S5** (related to Figure 2 and Table S4). List of all protein-coding genes with abundance greater than 100 TPM in SKOV3ip1.

| Gene id         | Gene name | Gene length | SKOV3ip1 FRT average abundance (TPM) | SKOV3ip1 protein coding rank | INOF FRT average abundance (TPM) | INOF protein coding rank |
|-----------------|-----------|-------------|--------------------------------------|------------------------------|----------------------------------|--------------------------|
| ENSG00000156508 | EEF1A1    | 8047        | 1339.887                             | 1                            | 502,8535                         | 3                        |
| ENSG00000197956 | S100A6    | 1645        | 1052.295                             | 2                            | 90,9755                          | 40                       |
| ENSG00000124942 | AHNAK     | 122693      | 904.1208                             | 3                            | 196,0134                         | 14                       |
| ENSG00000167996 | FTH1      | 7942        | 895.2919                             | 4                            | 145,6419                         | 22                       |
| ENSG00000167658 | EEF2      | 9413        | 697.0203                             | 5                            | 365,7956                         | 5                        |
| ENSG00000034510 | TMSB10    | 1050        | 647.222                              | 6                            | 249,5061                         | 11                       |
| ENSG00000205542 | TMSB4X    | 2119        | 642.129                              | 7                            | 605,5317                         | 1                        |
| ENSG00000134352 | IL6ST     | 59898       | 573.8624                             | 8                            | 556,8915                         | 2                        |
| ENSG00000074800 | ENO1      | 18247       | 442.8957                             | 9                            | 58,3131                          | 83                       |
| ENSG00000136527 | TRA2B     | 22230       | 437.183                              | 10                           | 61,6651                          | 77                       |
| ENSG00000184009 | ACTG1     | 13876       | 432.2191                             | 11                           | 263,0431                         | 10                       |
| ENSG00000124486 | USP9X     | 150944      | 404.7235                             | 12                           | 113,1335                         | 29                       |
| ENSG00000108298 | RPL19     | 4444        | 366.8748                             | 13                           | 63,3646                          | 71                       |
| ENSG00000089157 | RPLP0     | 4549        | 363.3004                             | 14                           | 104,8120                         | 32                       |
| ENSG00000229117 | RPL41     | 1357        | 353.9832                             | 15                           | 101,3086                         | 35                       |
| ENSG00000067225 | PKM       | 32793       | 328.9003                             | 16                           | 83,5513                          | 45                       |
| ENSG00000134871 | COL4A2    | 207215      | 305.281                              | 17                           | 448,2319                         | 4                        |
| ENSG00000231500 | RPS18     | 4500        | 299.9977                             | 18                           | 114,3638                         | 28                       |
| ENSG00000112306 | RPS12     | 3123        | 295.687                              | 19                           | 88,7502                          | 41                       |
| ENSG00000092841 | MYL6      | 5335        | 278.0255                             | 20                           | 193,9721                         | 15                       |
| ENSG00000196154 | S100A4    | 6523        | 269.9995                             | 21                           | 0,0910                           | 10953                    |
| ENSG00000152409 | JMY       | 91026       | 268.4495                             | 22                           | 7,8367                           | 797                      |
| ENSG00000140988 | RPS2      | 2808        | 266.6582                             | 23                           | 61,2506                          | 79                       |
| ENSG00000182718 | ANXA2     | 55749       | 264.5948                             | 24                           | 62,5462                          | 74                       |
| ENSG00000145425 | RPS3A     | 5079        | 263.4244                             | 25                           | 87,7159                          | 43                       |
| ENSG00000187837 | HIST1H1C  | 641         | 259.7633                             | 26                           | 37,9529                          | 134                      |
| ENSG00000008988 | RPS20     | 7286        | 242.7897                             | 27                           | 75,9861                          | 52                       |
| ENSG00000141736 | ERBB2     | 42512       | 242.4466                             | 28                           | 0,8758                           | 5955                     |
| ENSG00000092148 | HECTD1    | 107692      | 240.1952                             | 29                           | 55,2704                          | 92                       |
| ENSG00000134333 | LDHA      | 14037       | 237.9606                             | 30                           | 34,6958                          | 150                      |
| ENSG00000138326 | RPS24     | 23052       | 235.3905                             | 31                           | 81,4192                          | 48                       |
| ENSG00000105974 | CAV1      | 36399       | 234.7079                             | 32                           | 30,1625                          | 175                      |
| ENSG00000026025 | VIM       | 9334        | 229.3214                             | 33                           | 142,4967                         | 23                       |
| ENSG00000136942 | RPL35     | 4101        | 227.7768                             | 34                           | 54,3355                          | 95                       |
| ENSG00000111640 | GAPDH     | 4447        | 226.3353                             | 35                           | 132,7998                         | 24                       |
| ENSG00000273542 | HIST1H4K  | 311         | 224.319                              | 36                           | 31,8492                          | 164                      |
| ENSG00000087086 | FTL       | 1577        | 221.6377                             | 37                           | 196,0283                         | 13                       |
| ENSG00000197061 | HIST1H4C  | 434         | 220.2348                             | 38                           | 20,1610                          | 265                      |
| ENSG00000172757 | CFL1      | 39004       | 219.8038                             | 39                           | 91,8462                          | 38                       |
| ENSG00000196262 | PPIA      | 27884       | 219.6427                             | 40                           | 74,2481                          | 53                       |
| ENSG00000147403 | RPL10     | 19213       | 217.8391                             | 41                           | 131,2604                         | 25                       |
| ENSG00000206503 | HLA-A     | 4624        | 215.6137                             | 42                           | 76,3862                          | 51                       |
| ENSG00000123416 | TUBA1B    | 3615        | 214.2238                             | 43                           | 48,1335                          | 112                      |
| ENSG00000133112 | TPT1      | 7899        | 214.0906                             | 44                           | 104,1897                         | 34                       |
| ENSG00000274267 | HIST1H3B  | 410         | 213.8559                             | 45                           | 26,3025                          | 195                      |
| ENSG00000163682 | RPL9      | 4824        | 209.5798                             | 46                           | 66,7768                          | 64                       |
| ENSG00000147604 | RPL7      | 5522        | 201.5211                             | 47                           | 57,3043                          | 85                       |
| ENSG00000142541 | RPL13A    | 4754        | 201.2846                             | 48                           | 87,8047                          | 42                       |
| ENSG00000198804 | MT-CO1    | 1541        | 199.4792                             | 49                           | 91,5667                          | 39                       |
| ENSG00000065978 | YBX1      | 19922       | 196.4635                             | 50                           | 22,4775                          | 231                      |
| ENSG00000181163 | NPM1      | 24021       | 196.055                              | 51                           | 34,6802                          | 151                      |
| ENSG00000177954 | RPS27     | 1391        | 195.9607                             | 52                           | 72,4902                          | 56                       |
| ENSG00000136813 | KIAA0368  | 124053      | 195.1797                             | 53                           | 39,0286                          | 130                      |
| ENSG00000117450 | PRDX1     | 12011       | 193.7347                             | 54                           | 28,6494                          | 181                      |
| ENSG00000198938 | MT-CO3    | 783         | 192.1585                             | 55                           | 67,8074                          | 61                       |
| ENSG00000089009 | RPL6      | 13648       | 190.5738                             | 56                           | 49,3331                          | 110                      |
| ENSG00000131469 | RPL27     | 4686        | 189.6372                             | 57                           | 49,6294                          | 109                      |
| ENSG00000162434 | JAK1      | 133275      | 188.1401                             | 58                           | 52,9018                          | 99                       |
| ENSG00000166710 | B2M       | 7400        | 187.1137                             | 59                           | 154,4836                         | 21                       |

**Table S5** (related to Figure 2 and Table S4). List of all protein-coding genes with abundance greater than 100 TPM in SKOV3ip1 (continued).

| Gene id         | Gene name | Gene length | SKOV3ip1 FRT average abundance (TPM) | SKOV3ip1 protein coding rank | INOF FRT average abundance (TPM) | INOF protein coding rank |
|-----------------|-----------|-------------|--------------------------------------|------------------------------|----------------------------------|--------------------------|
| ENSG00000142937 | RPS8      | 3528        | 185,2385944                          | 60                           | 83,8907501                       | 44                       |
| ENSG00000112715 | VEGFA     | 16303       | 184,2909183                          | 61                           | 54,0231466                       | 96                       |
| ENSG00000149273 | RPS3      | 22794       | 180,6468841                          | 62                           | 66,4748811                       | 65                       |
| ENSG00000164587 | RPS14     | 6566        | 180,3798057                          | 63                           | 62,2891248                       | 75                       |
| ENSG00000187514 | PTMA      | 6646        | 179,747785                           | 64                           | 27,9701715                       | 186                      |
| ENSG00000150991 | UBC       | 5764        | 177,5098571                          | 65                           | 50,0029955                       | 106                      |
| ENSG00000156482 | RPL30     | 21618       | 177,3616229                          | 66                           | 56,5569255                       | 86                       |
| ENSG00000142676 | RPL11     | 4646        | 174,1782902                          | 67                           | 58,2572684                       | 84                       |
| ENSG00000171863 | RPS7      | 5714        | 174,0813192                          | 68                           | 65,5897689                       | 68                       |
| ENSG00000091527 | CDV3      | 16531       | 173,4036012                          | 69                           | 30,2522297                       | 174                      |
| ENSG00000177600 | RPL2      | 3233        | 173,1158956                          | 70                           | 32,6971761                       | 159                      |
| ENSG00000152818 | UTRN      | 567333      | 172,4630631                          | 71                           | 51,4099762                       | 102                      |
| ENSG00000075624 | ACTB      | 36633       | 171,7495056                          | 72                           | 274,734432                       | 9                        |
| ENSG00000197238 | HIST1H4J  | 372         | 167,0785797                          | 73                           | 20,9283363                       | 251                      |
| ENSG00000182774 | RPS17     | 3811        | 166,4324179                          | 74                           | 55,481299                        | 88                       |
| ENSG00000130255 | RPL36     | 16929       | 166,2935791                          | 75                           | 25,9065965                       | 197                      |
| ENSG00000142534 | RPS11     | 3324        | 165,8401624                          | 76                           | 60,5340947                       | 80                       |
| ENSG00000114391 | RPL24     | 5691        | 162,4745028                          | 77                           | 43,0789838                       | 121                      |
| ENSG00000213741 | RPS29     | 28180       | 159,6994516                          | 78                           | 72,9076766                       | 54                       |
| ENSG00000171858 | RPS21     | 1404        | 157,6144421                          | 79                           | 43,3450998                       | 120                      |
| ENSG00000168298 | HIST1H1E  | 753         | 157,2683117                          | 80                           | 16,8638879                       | 312                      |
| ENSG00000276368 | HIST1H2AJ | 386         | 156,5591782                          | 81                           | 9,66324206                       | 621                      |
| ENSG00000197958 | RPL12     | 3731        | 155,3231812                          | 82                           | 49,6685886                       | 108                      |
| ENSG00000148303 | RPL7A     | 3212        | 154,946237                           | 83                           | 66,2836093                       | 66                       |
| ENSG00000105193 | RPS16     | 2741        | 153,791609                           | 84                           | 47,0460768                       | 113                      |
| ENSG00000135486 | HNRNPA1   | 6895        | 148,4653045                          | 85                           | 21,1746443                       | 248                      |
| ENSG00000197746 | PSAP      | 35077       | 148,1646493                          | 86                           | 33,0682135                       | 158                      |
| ENSG00000265972 | TXNIP     | 4165        | 146,2784482                          | 87                           | 0,19873687                       | 9890                     |
| ENSG00000161016 | RPL8      | 2822        | 145,5460882                          | 88                           | 36,5322115                       | 143                      |
| ENSG00000150093 | ITGB1     | 105473      | 145,2016204                          | 89                           | 154,960716                       | 20                       |
| ENSG00000198918 | RPL39     | 5139        | 145,2014496                          | 90                           | 68,4338141                       | 60                       |
| ENSG00000135046 | ANXA1     | 18636       | 143,1383588                          | 91                           | 21,445788                        | 242                      |
| ENSG00000143384 | MCL1      | 5187        | 142,7862826                          | 92                           | 45,5809586                       | 116                      |
| ENSG00000197903 | HIST1H2BK | 380         | 142,0714021                          | 93                           | 13,8727438                       | 404                      |
| ENSG00000198755 | RPL10A    | 2377        | 141,9584609                          | 94                           | 55,1202809                       | 93                       |
| ENSG00000188643 | S100A16   | 6259        | 141,7992867                          | 95                           | 16,2330151                       | 333                      |
| ENSG00000204628 | RACK1     | 11187       | 141,2429964                          | 96                           | 55,3500504                       | 90                       |
| ENSG00000198034 | RPS4X     | 21621       | 140,5275915                          | 97                           | 50,0375071                       | 105                      |
| ENSG00000054654 | SYNE2     | 373450      | 140,2683116                          | 98                           | 6,6372242                        | 946                      |
| ENSG00000105640 | RPL18A    | 4277        | 139,8018831                          | 99                           | 48,3306504                       | 111                      |
| ENSG00000149925 | ALDOA     | 17367       | 138,7425634                          | 100                          | 25,8808696                       | 198                      |
| ENSG00000104904 | OAZ1      | 3981        | 138,3287992                          | 101                          | 66,0837119                       | 67                       |
| ENSG00000006327 | TNFRSF12A | 3938        | 137,2926352                          | 102                          | 24,1175077                       | 216                      |
| ENSG00000092199 | HNRNPC    | 60358       | 136,8907026                          | 103                          | 26,1170762                       | 196                      |
| ENSG00000185567 | AHNAK2    | 41113       | 133,0718495                          | 104                          | 6,23526232                       | 1002                     |
| ENSG00000143947 | RPS27A    | 3950        | 132,0883115                          | 105                          | 36,3898426                       | 144                      |
| ENSG00000100316 | RPL3      | 7507        | 128,3814989                          | 106                          | 36,9111206                       | 139                      |
| ENSG00000183255 | PTTG1IP   | 24318       | 125,8833367                          | 107                          | 12,9315733                       | 437                      |
| ENSG00000109971 | HSPA8     | 5741        | 124,1112858                          | 108                          | 69,9055331                       | 58                       |
| ENSG00000100644 | HIF1A     | 52746       | 123,7407058                          | 109                          | 15,6979608                       | 350                      |
| ENSG00000137154 | RPS6      | 4539        | 120,7080629                          | 110                          | 66,7939485                       | 63                       |
| ENSG00000110955 | ATP5B     | 7893        | 120,4608544                          | 111                          | 20,3948204                       | 257                      |
| ENSG00000174718 | KIAA1551  | 33737       | 120,2723751                          | 112                          | 0,64673628                       | 7000                     |
| ENSG00000113013 | HSPA9     | 20562       | 120,107456                           | 113                          | 9,08617756                       | 674                      |
| ENSG00000110700 | RPS13     | 3398        | 120,0083213                          | 114                          | 37,7496648                       | 136                      |
| ENSG00000119335 | SET       | 12976       | 119,438906                           | 115                          | 11,6716049                       | 492                      |
| ENSG00000125968 | ID1       | 1232        | 118,7424858                          | 116                          | 0,4814278                        | 7878                     |
| ENSG00000272398 | CD24      | 5796        | 118,6112141                          | 117                          | 0,02349353                       | 12204                    |
| ENSG00000180596 | HIST1H2BC | 9053        | 118,3785749                          | 118                          | 8,44549448                       | 730                      |

**Table S5** (related to Figure 2 and Table S4). List of all protein-coding genes with abundance greater than 100 TPM in SKOV3ip1 (continued).

| Gene id         | Gene name | Gene length | SKOV3ip1 FRT average abundance (TPM) | SKOV3ip1 protein coding rank | INOF FRT average abundance (TPM) | INOF protein coding rank |
|-----------------|-----------|-------------|--------------------------------------|------------------------------|----------------------------------|--------------------------|
| ENSG00000162402 | USP24     | 148754      | 116,6951044                          | 119                          | 19,1912693                       | 279                      |
| ENSG00000198830 | HMG2      | 3522        | 116,2212637                          | 120                          | 7,5537243                        | 823                      |
| ENSG00000105185 | PDCD5     | 6384        | 115,0676603                          | 121                          | 36,7063287                       | 141                      |
| ENSG00000092820 | EZR       | 53671       | 114,6510492                          | 122                          | 5,87333322                       | 1066                     |
| ENSG00000127603 | MACF1     | 405861      | 113,5020901                          | 123                          | 53,9057797                       | 98                       |
| ENSG00000168003 | SLC3A2    | 32773       | 113,2986823                          | 124                          | 6,84660323                       | 923                      |
| ENSG00000168028 | RPSA      | 5853        | 113,1458517                          | 125                          | 56,2421888                       | 87                       |
| ENSG00000180530 | NRIP1     | 104701      | 113,1254473                          | 126                          | 34,1441842                       | 152                      |
| ENSG00000143933 | CALM2     | 16519       | 110,804847                           | 127                          | 94,0137843                       | 37                       |
| ENSG00000080824 | HSP90AA1  | 58961       | 110,7757948                          | 128                          | 16,6242727                       | 320                      |
| ENSG00000135404 | CD63      | 4384        | 109,8503961                          | 129                          | 55,4410028                       | 89                       |
| ENSG00000277157 | HIST1H4D  | 311         | 109,3168177                          | 130                          | 18,0852479                       | 298                      |
| ENSG00000106682 | EIF4H     | 22856       | 108,250627                           | 131                          | 13,1474828                       | 429                      |
| ENSG00000096384 | HSP90AB1  | 7722        | 106,951343                           | 132                          | 20,3043054                       | 260                      |
| ENSG00000083857 | FAT1      | 138939      | 106,3755969                          | 133                          | 33,9005472                       | 155                      |
| ENSG00000124635 | HIST1H2BJ | 6853        | 104,4675178                          | 134                          | 11,3798253                       | 506                      |
| ENSG00000196924 | FLNA      | 26114       | 102,2070771                          | 135                          | 62,1351628                       | 76                       |
| ENSG00000137331 | IER3      | 1355        | 101,8533498                          | 136                          | 20,5307306                       | 255                      |
| ENSG00000178913 | TAF7      | 60596       | 101,8260774                          | 137                          | 15,7953277                       | 347                      |
| ENSG00000174444 | RPL4      | 26517       | 101,3494604                          | 138                          | 45,8068504                       | 114                      |
| ENSG00000132475 | H3F3B     | 9459        | 101,3069759                          | 139                          | 14,6550447                       | 381                      |
| ENSG00000136810 | TXN       | 12829       | 100,5645483                          | 140                          | 21,2680071                       | 244                      |

| GO term                                              | GO_ID      | # genes from background with this annotation (total background genes considered) | # genes with >100 TPM and with this annotation (total genes with >100 TPM considered) | Benjamini corrected p-value |
|------------------------------------------------------|------------|----------------------------------------------------------------------------------|---------------------------------------------------------------------------------------|-----------------------------|
| translational elongation                             | GO:0006414 | 101 (13528)                                                                      | 47 (130)                                                                              | 1.6 E-65                    |
| translation                                          | GO:0006412 | 331 (13528)                                                                      | 48 (130)                                                                              | 3.0 E-40                    |
| ribosomal small subunit biogenesis                   | GO:0042274 | 11 (13528)                                                                       | 7 (130)                                                                               | 1.3 E-07                    |
| nucleosome assembly                                  | GO:0006334 | 84 (13528)                                                                       | 11 (130)                                                                              | 2.2 E-06                    |
| chromatin assembly                                   | GO:0031497 | 87 (13528)                                                                       | 11 (130)                                                                              | 2.5 E-06                    |
| protein-DNA complex assembly                         | GO:0065004 | 91 (13528)                                                                       | 11 (130)                                                                              | 3.3 E-06                    |
| nucleosome organization                              | GO:0034728 | 93 (13528)                                                                       | 11 (130)                                                                              | 3.5 E-06                    |
| ribosome biogenesis                                  | GO:0042254 | 122 (13528)                                                                      | 12 (130)                                                                              | 3.7 E-06                    |
| cellular macromolecular complex assembly             | GO:0034622 | 318 (13528)                                                                      | 17 (130)                                                                              | 8.6 E-06                    |
| DNA packaging                                        | GO:0006323 | 117 (13528)                                                                      | 11 (130)                                                                              | 2.2 E-05                    |
| cellular macromolecular complex subunit organization | GO:0034621 | 357 (13528)                                                                      | 17 (130)                                                                              | 3.4 E-05                    |
| chromatin assembly or disassembly                    | GO:0006333 | 127 (13528)                                                                      | 11 (130)                                                                              | 4.0 E-05                    |
| ribonucleoprotein complex biogenesis                 | GO:0022613 | 180 (13528)                                                                      | 12 (130)                                                                              | 1.2 E-04                    |
| cell motion                                          | GO:0006928 | 475 (13528)                                                                      | 17 (130)                                                                              | 1.1 E-03                    |
| rRNA processing                                      | GO:0006364 | 92 (13528)                                                                       | 8 (130)                                                                               | 2.4 E-03                    |
| rRNA metabolic process                               | GO:0016072 | 96 (13528)                                                                       | 8 (130)                                                                               | 3.0 E-03                    |
| ribosomal large subunit biogenesis                   | GO:0042273 | 10 (13528)                                                                       | 4 (130)                                                                               | 7.6 E-03                    |
| anti-apoptosis                                       | GO:0006916 | 206 (13528)                                                                      | 10 (130)                                                                              | 1.2 E-02                    |
| response to calcium ion                              | GO:0051592 | 55 (13528)                                                                       | 6 (130)                                                                               | 1.2 E-02                    |
| macromolecular complex assembly                      | GO:0065003 | 665 (13528)                                                                      | 18 (130)                                                                              | 1.3 E-02                    |
| regulation of apoptosis                              | GO:0042981 | 804 (13528)                                                                      | 20 (130)                                                                              | 1.4 E-02                    |
| regulation of programmed cell death                  | GO:0043067 | 812 (13528)                                                                      | 20 (130)                                                                              | 1.5 E-02                    |
| regulation of cell death                             | GO:0010941 | 815 (13528)                                                                      | 20 (130)                                                                              | 1.5 E-02                    |
| homeostatic process                                  | GO:0042592 | 751 (13528)                                                                      | 19 (130)                                                                              | 1.5 E-02                    |
| maintenance of location                              | GO:0051235 | 64 (13528)                                                                       | 6 (130)                                                                               | 1.9 E-02                    |

**Table S6** (related to Figure 2C). Top Gene Ontology (GO) enriched biological process terms for the group of protein-coding genes with highest abundance (>100 TPM).



| Forward Name  | Reverse Name  | Forward Sequence               | Reverse Sequence               |
|---------------|---------------|--------------------------------|--------------------------------|
| RN7SK.q.F1    | RN7SK.q.R1    | CGGTCTTCGGTCAAGGGTATACG        | AGCGCCTCATTGGATGTGTCT          |
| RN7SL2.q.F1   | RN7SL2.q.R1   | AGGTCGGAAACGGAGCAGGTC          | CGGGGTCTCGCTATGTTGCT           |
| RNY1.q.F1     | RNY1.q.R1     | TTGATTGTTACAGTCAGTTACAGATCG    | AGTCAAGTGCAGTAGTGAGAAGGG       |
| RNY3.q.F1     | RNY3.q.R1     | TGGTGTTTACAACCTAATTGATCACACCAG | AGCAGTGGGAGTGGAGAAGGAACAAAG    |
| SCARNA18.q.F1 | SCARNA18.q.R1 | TGCTTCTCATTCTTGGGAGCA          | TGTTGGAGAAATATACTACCACTCAACCT  |
| SCARNA1.q.F1  | SCARNA1.q.R1  | ACCGAGCTGTCTATATCCTAGCCT       | ACTGGGCTTAAAAGACTCATGGCT       |
| SCARNA22.q.F1 | SCARNA22.q.R1 | GTCCTGACCTGTCTCTGTGAGC         | TGTAAGTAAAACCGTGGTGTCTCT       |
| SNORA28.q.F1  | SNORA28.q.R1  | GGCAGATGATCAAACTGTCTGACAC      | AGTCTATATAACGGCTGTCTCATGGG     |
| SNORA34.q.F1  | SNORA34.q.R1  | AGACCAGCAGTTGTAAGTGTGGC        | GCCATTCCCTACTGAGGTCCCA         |
| SNORA44.q.F1  | SNORA44.q.R1  | GGGCTGTGGCTGGTCATAGC           | AAAGCTGAGTGGCAGCTTGCAG         |
| SNORA46.q.F1  | SNORA46.q.R1  | TCCCCATTCTTGGTTACGCTGT         | TGTTCCCTAACTCTATACAGCAACAGCA   |
| SNORA63.q.F1  | SNORA63.q.R1  | TAAGTGCTGTGTTGTCGTTCCCC        | TATGAGACCAAGCGTCCCTGGC         |
| SNORA64.q.F1  | SNORA64.q.R1  | AGTTGCACCTTGGCTTACCCG          | GCACCCCTCAAGGAAAGAGAGG         |
| SNORA68.q.F1  | SNORA68.q.R1  | GAATCACTGTTTCTTATAGCGGTGGTT    | AAATTCACCTTGGAGGGGCACGG        |
| SNORD16.q.F1  | SNORD16.q.R1  | AATTTGCGTCTTACTCTGTTCTCAGC     | TCAGTAAGAATTTTCGTCAACCTTCTGTAC |
| SNORD32A.q.F1 | SNORD32A.q.R1 | AACATTCACCATCTTTGTTGAGTCTCAC   | GTCTCAGAGCGGTGCATGGG           |
| SNORD46.q.F1  | SNORD46.q.R1  | AAAAGAATCCTTAGGCGTGGTTGTG      | CAGTCAGTGTAAGTATGACAAGTCCCTG   |
| SNORD67.q.F1  | SNORD67.q.R1  | GTTGCACACTGGTGGAGCCATG         | GAGTCAGATGGCCCTGTGC            |
| SNORD83A.q.F1 | SNORD83A.q.R1 | AGGCTCAGAGTGAGCGCTGG           | GTTCTCAGAAAGGAGGCAGTAGAGAA     |
| SNORD89.q.F1  | SNORD89.q.R1  | ACAAGAAAAGGCCGAATTGCAGT        | GAGGTCAGACTAGTGGTTCGCTT        |
| VTRNA1-1.q.F1 | VTRNA1-1.q.R1 | TCAGCGGTTACTTCGACAGTTCT        | AGGACTGGAGAGCGCCCG             |
| VTRNA1-2.q.F1 | VTRNA1-2.q.R1 | TCAGCGGTTACTTCGAGTACATTGT      | AGAGCTGGAAAGCACCCGCG           |
| SNORA23.q.F1  | SNORA23.q.R1  | GATCTTGCTATCCACACAAACATCATGC   | TCCAGAGACAACACTAGACCAGTACT     |
| SNORD124.q.F1 | SNORD124.q.R1 | GGATGATGTTCCAGTTGAGACTCAAGAA   | GGTCAGGGACCAAGTGGCTCC          |
| SNORD13.q.F1  | SNORD13.q.R1  | AGCGTGATGATTGGGTGTTTCATACG     | CAGACGGGTAATGTGCCACG           |
| SNORD88C.q.F1 | SNORD88C.q.R1 | AGCACTGGGCTCTGATCACCC          | CCTCAGACCCCGAGGTGTCAA          |

**Table S10** (related to Figure S6). List of primers used for digital PCR analysis of sncRNA
